# Supplementary material for: The Contribution of Foods and Beverages of Low Nutritional Value to the Diets of Swedish Adolescents, by Food Group, Time and Place. A Nationally Representative Study
Source: MDPI journal article supplement (doi:10.3390/nu13072450), 2021-07-17
Supplement: s1 [file s1]

**Table S2** Contribution of meal types to consumption of total energy, the proportion of each meal (by energy) that is from discretionary foods/beverages, and the top three discretionary foods/beverages contributing most to total energy at each meal type, by age and gender

| School grade: 5th<br>Girls (N=599) | Boys (N=490)    |                     |                                  |                     | 8th<br>Girls (N=574)             |                     |                                  |                     | Boys (N=476)                     |                     |                                  |                     | 11th<br>Girls (N=577)            |                     |                                  |                     | Boys (N=423)    |                     |                 |                     |
|------------------------------------|-----------------|---------------------|----------------------------------|---------------------|----------------------------------|---------------------|----------------------------------|---------------------|----------------------------------|---------------------|----------------------------------|---------------------|----------------------------------|---------------------|----------------------------------|---------------------|-----------------|---------------------|-----------------|---------------------|
|                                    | % of            |                     | % of                             |                     | % of                             |                     | % of                             |                     | % of                             |                     | % of                             |                     | % of                             |                     | % of                             |                     | % of            |                     | % of            |                     |
|                                    | % of<br>total E | which is<br>disc. E | % of<br>total E                  | which is<br>disc. E | % of<br>total E                  | which is<br>disc. E | % of<br>total E                  | which is<br>disc. E | % of<br>total E                  | which is<br>disc. E | % of<br>total E                  | which is<br>disc. E | % of<br>total E                  | which is<br>disc. E | % of<br>total E                  | which is<br>disc. E | % of<br>total E | which is<br>disc. E | % of<br>total E | which is<br>disc. E |
| Breakfast                          | 20.1            | 19                  |                                  |                     | 20.1                             | 19                  | 18.6                             | 19                  |                                  |                     | 19.0                             | 20                  | 18.0                             | 20                  |                                  |                     | 16.7            | 20                  |                 |                     |
| Mixed fat spread*                  | 1.0             |                     | Pies, pizza, toasted sandwiches* | 0.9                 | Mixed fat spread*                | 0.9                 | Pies, pizza, toasted sandwiches* | 1.1                 | Mixed fat spread*                | 0.9                 | Pies, pizza, toasted sandwiches* | 0.8                 | Pies, pizza, toasted sandwiches* | 0.9                 | Pies, pizza, toasted sandwiches* | 0.8                 |                 |                     |                 |                     |
| Pies, pizza, toasted sandwiches*   | 0.9             |                     | Mixed fat spread*                | 0.8                 | Pies, pizza, toasted sandwiches* | 0.9                 | Mixed fat spread*                | 0.8                 | Pies, pizza, toasted sandwiches* | 0.6                 | Pies, pizza, toasted sandwiches* | 0.6                 | Pies, pizza, toasted sandwiches* | 0.6                 | Mixed fat spread*                | 0.6                 |                 |                     |                 |                     |
| Cakes, biscuits                    | 0.3             |                     | Jam, marmelade                   | 0.4                 | Cakes, biscuits                  | 0.2                 | Cakes, biscuits                  | 0.3                 |                 |                     |                 |                     |
| Lunch                              | 25.8            | 28                  |                                  |                     | 26.2                             | 27                  | 22.9                             | 26                  |                                  |                     | 25.2                             | 29                  | 23.9                             | 29                  |                                  |                     | 27.1            | 29                  |                 |                     |
| Sausages*                          | 1.1             |                     | Sausages*                        | 1.4                 | Sausage dishes                   | 0.9                 | Pies, pizza, toasted sandwiches* | 1.3                 | Pies, pizza, toasted sandwiches* | 1.8                 | Pies, pizza, toasted sandwiches* | 1.7                 | Pies, pizza, toasted sandwiches* | 1.8                 | Pies, pizza, toasted sandwiches* | 1.7                 |                 |                     |                 |                     |
| Pies, pizza, toasted sandwiches*   | 0.8             |                     | Pies, pizza, toasted sandwiches* | 0.9                 | Pies, pizza, toasted sandwiches* | 0.8                 | Sausage dishes                   | 1.1                 | Sausage dishes                   | 1.1                 | Sauces, dressings*               | 1.0                 | Sauces, dressings*               | 1.1                 | Sugar-sweetened beverages        | 1.0                 |                 |                     |                 |                     |
| Sausage dishes                     | 0.8             |                     | Sweetened beverages              | 0.6                 | Sauces, dressings*               | 0.6                 | Sausages*                        | 0.8                 | Sausages*                        | 0.8                 | Sugar-sweetened beverages        | 0.8                 | Sauces, dressings*               | 0.8                 | Sauces, dressings*               | 0.8                 |                 |                     |                 |                     |
| Dinner                             | 30.7            | 34                  |                                  |                     | 34.9                             | 34                  | 30.7                             | 31                  |                                  |                     | 33.0                             | 33                  | 31.0                             | 33                  |                                  |                     | 34.2            | 33                  |                 |                     |
| Pies, pizza, toasted sandwiches*   | 1.9             |                     | Pies, pizza, toasted sandwiches* | 2.5                 | Pies, pizza, toasted sandwiches* | 2.3                 | Pies, pizza, toasted sandwiches* | 3.0                 | Pies, pizza, toasted sandwiches* | 2.4                 | Pies, pizza, toasted sandwiches* | 3.0                 | Pies, pizza, toasted sandwiches* | 2.4                 | Pies, pizza, toasted sandwiches* | 3.0                 |                 |                     |                 |                     |
| Sugar-sweetened beverages          | 1.5             |                     | Sugar-sweetened beverages        | 1.9                 | Sugar-sweetened beverages        | 1.2                 | Sugar-sweetened beverages        | 1.8                 | Sugar-sweetened beverages        | 1.5                 | Sauces, dressings                | 1.8                 | Sauces, dressings                | 1.5                 | Sugar-sweetened beverages        | 1.8                 |                 |                     |                 |                     |
| Potato products and dishes*        | 1.2             |                     | Sausages*                        | 1.0                 | Sauces, dressings*               | 1.0                 | Potato products and dishes*      | 1.3                 | Potato products and dishes*      | 1.5                 | Sausages*                        | 1.3                 | Sausages*                        | 1.5                 | Sausages*                        | 1.3                 |                 |                     |                 |                     |
| Snack/between meal                 | 10.0            | 36                  |                                  |                     | 9.2                              | 39                  | 10.5                             | 33                  |                                  |                     | 8.7                              | 35                  | 9.2                              | 35                  |                                  |                     | 7.7             | 35                  |                 |                     |
| Cakes, biscuits                    | 1.0             |                     | Cakes, biscuits                  | 1.0                 | Cakes, biscuits                  | 0.9                 | Cakes, biscuits                  | 0.9                 | Cakes, biscuits                  | 1.2                 | Cakes, biscuits                  | 0.7                 | Cakes, biscuits                  | 1.2                 | Cakes, biscuits                  | 0.7                 |                 |                     |                 |                     |
| Desserts, icecream                 | 0.5             |                     | Pies, pizza, toasted sandwiches* | 0.5                 | Sweets, chocolate                | 0.7                 | Sweets, chocolate                | 0.4                 | Sweets, chocolate                | 0.5                 | Pies, pizza, toasted sandwiches* | 0.3                 | Pies, pizza, toasted sandwiches* | 0.5                 | Pies, pizza, toasted sandwiches* | 0.3                 |                 |                     |                 |                     |
| Sweets, chocolate                  | 0.5             |                     | Sweets, chocolate                | 0.5                 | Mixed fat spread*                | 0.3                 | Pies, pizza, toasted sandwiches* | 0.3                 | Pies, pizza, toasted sandwiches* | 0.4                 | Sweets, chocolate                | 0.4                 | Sweets, chocolate                | 0.4                 | Sugar-sweetened beverages        | 0.3                 |                 |                     |                 |                     |
| Other                              | 12.8            | 84                  |                                  |                     | 9.2                              | 79                  | 16.5                             | 84                  |                                  |                     | 13.2                             | 79                  | 15.9                             | 79                  |                                  |                     | 11.7            | 79                  |                 |                     |
| Sweets, chocolate                  | 4.8             |                     | Sweets, chocolate                | 3.1                 | Cakes, biscuits                  | 3.2                 | Sweets, chocolate                | 5.6                 | Sweets, chocolate                | 5.1                 | Sweets, chocolate                | 2.8                 | Sweets, chocolate                | 5.1                 | Sweets, chocolate                | 2.8                 |                 |                     |                 |                     |
| Cakes, biscuits                    | 2.2             |                     | Crisps, savoury snacks           | 1.6                 | Crisps, savoury snacks           | 1.7                 | Crisps, savoury snacks           | 1.9                 | Cakes, biscuits                  | 2.6                 | Crisps, savoury snacks           | 2.2                 | Crisps, savoury snacks           | 2.6                 | Crisps, savoury snacks           | 2.2                 |                 |                     |                 |                     |
| Crisps, savoury snacks             | 1.7             |                     | Cakes, biscuits                  | 1.1                 | Desserts, icecream               | 1.0                 | Cakes, biscuits                  | 1.3                 | Crisps, savoury snacks           | 2.0                 | Cakes, biscuits                  | 1.6                 | Crisps, savoury snacks           | 2.0                 | Cakes, biscuits                  | 1.6                 |                 |                     |                 |                     |
| Beverage (mainly)                  | 0.6             | 35                  |                                  |                     | 0.5                              | 46                  | 0.8                              | 51                  |                                  |                     | 0.8                              | 85                  | 2.1                              | 85                  |                                  |                     | 2.6             | 85                  |                 |                     |
| Sugar-sweetened beverages          | 0.1             |                     | Sugar-sweetened beverages        | 0.2                 | Cakes, biscuits                  | 0.01                | Sugar-sweetened beverages        | 0.4                 | Sugar-sweetened beverages        | 0.6                 | Sugar-sweetened beverages        | 0.7                 | Sugar-sweetened beverages        | 0.6                 | Sugar-sweetened beverages        | 0.7                 |                 |                     |                 |                     |
| Sugar, syrup, honey                | 0.02            |                     | Sweets, chocolate                | 0.05                | Cider, alcopops                  | 0.01                | Sweets, chocolate                | 0.02                | Sweets, chocolate                | 0.6                 | Cider, alcopops                  | 0.4                 | Beer                             | 0.6                 | Beer                             | 0.4                 |                 |                     |                 |                     |
| Desserts, icecream                 | 0.02            |                     | Dietary supplements              | 0.00                | Desserts, icecream               | 0.01                | Dietary supplements              | 0.01                | Dietary supplements              | 0.1                 | Beer                             | 0.1                 | Dietary supplements              | 0.1                 | Dietary supplements              | 0.4                 |                 |                     |                 |                     |

\* Food group that contains both discretionary and non-discretionary foods

E, energy

Disc, discretionary
