# Supplementary material for: The Contribution of Foods and Beverages of Low Nutritional Value to the Diets of Swedish Adolescents, by Food Group, Time and Place. A Nationally Representative Study
Source: MDPI journal article supplement (doi:10.3390/nu13072450), 2021-07-17
Supplement: s1 [file s1]

**Supplementary File 1.** Foods classified as discretionary

| Food item                                                                            | Classed as discretionary? | Decision was based on (with respect to the Australian definition)*      | Original food group       | Food group as used in analysis (if different) |
|--------------------------------------------------------------------------------------|---------------------------|-------------------------------------------------------------------------|---------------------------|-----------------------------------------------|
| Carbonated soft drinks sweetened w/ synthetic sweeteners                             | Yes                       | All artificial sweeteners classed as discretionary                      | "Light drinks"            |                                               |
| Diet Cola sweetened w/ synthetic sweeteners                                          | Yes                       | All artificial sweeteners classed as discretionary                      | "Light drinks"            |                                               |
| Cordial artificial sweetener RTD                                                     | Yes                       | All artificial sweeteners classed as discretionary                      | "Light drinks"            |                                               |
| Kelp dried                                                                           | No                        |                                                                         | Algae                     |                                               |
| Artificial sweetener                                                                 | Yes                       | All artificial sweeteners classed as discretionary                      | Artificial sweetener      |                                               |
| Small beer or low-alcohol beer vol. % 2.3                                            | Yes                       | All alcoholic drinks classed as discretionary                           | Beer                      |                                               |
| Beer or pilsner vol. % 3.5                                                           | Yes                       | All alcoholic drinks classed as discretionary                           | Beer                      |                                               |
| Strong beer vol. % 5.4                                                               | Yes                       | All alcoholic drinks classed as discretionary                           | Beer                      |                                               |
| Non alcoholic beer                                                                   | Yes                       | All alcoholic drinks classed as discretionary                           | Beer                      |                                               |
| Raspberries                                                                          | No                        |                                                                         | Berries fresh frozen      |                                               |
| Strawberries                                                                         | No                        |                                                                         | Berries fresh frozen      |                                               |
| Blackberries                                                                         | No                        |                                                                         | Berries fresh frozen      |                                               |
| Blueberries                                                                          | No                        |                                                                         | Berries fresh frozen      |                                               |
| Berries fresh                                                                        | No                        |                                                                         | Berries fresh frozen      |                                               |
| Currant                                                                              | No                        |                                                                         | Berries fresh frozen      |                                               |
| Multi-vitamin beverage prepared from concentrate RTD                                 | Yes                       | All sugar-sweetened beverages classed as discretionary                  | Beverages miscellaneous   | Sugar-sweetened beverages                     |
| Water w/ vitamins and minerals added                                                 | Yes                       | All sugar-sweetened beverages classed as discretionary                  | Beverages miscellaneous   | Sugar-sweetened beverages                     |
| Blood bread boiled                                                                   | No                        |                                                                         | Blood products and dishes |                                               |
| Black pudding fat 13% fried                                                          | Yes                       | Sausage with more than 5g saturated fat classed as discretionary        | Blood products and dishes |                                               |
| Chicken stock RTE                                                                    | No                        |                                                                         | Bouillon                  |                                               |
| Veal brawn                                                                           | No                        | Classed as meat                                                         | Brawn                     |                                               |
| Breakfast cereal rice sugar cocoa powder fortified Coco Pops                         | Yes                       | Breakfast cereal with more than 30g sugar/100g classed as discretionary | Breakfast cereals         |                                               |
| Breakfast cereal fortified Kalaspuuffar                                              | Yes                       | Breakfast cereal with more than 30g sugar/100g classed as discretionary | Breakfast cereals         |                                               |
| Breakfast cereal fortified Rice Krispies                                             | No                        |                                                                         | Breakfast cereals         |                                               |
| Breakfast cereal fortified Frosties                                                  | No                        |                                                                         | Breakfast cereals         |                                               |
| Muesli                                                                               | No                        |                                                                         | Breakfast cereals         |                                               |
| Granola start                                                                        | No                        |                                                                         | Breakfast cereals         |                                               |
| Breakfast cereals rings                                                              | No                        |                                                                         | Breakfast cereals         |                                               |
| Breakfast cereals squares                                                            | No                        |                                                                         | Breakfast cereals         |                                               |
| Breakfast cereals bran flakes                                                        | No                        |                                                                         | Breakfast cereals         |                                               |
| Breakfast cereals corn flakes                                                        | No                        |                                                                         | Breakfast cereals         |                                               |
| Breakfast cereals Special K                                                          | No                        |                                                                         | Breakfast cereals         |                                               |
| Cereals w/ red fruit                                                                 | No                        |                                                                         | Breakfast cereals         |                                               |
| Butter 80 % fat                                                                      | Yes                       | Fat (butter) classed as discretionary                                   | Butter                    |                                               |
| Butter flavoured w/ garlic or parsley                                                | Yes                       | Fat (butter) classed as discretionary                                   | Butter                    |                                               |
| Cocoa powder fat 20-22%                                                              | Yes                       | Classed as discretionary                                                | Cacao products            |                                               |
| Sweet wheat bread cinnamon buns home-made                                            | Yes                       | All cakes, biscuits classed as discretionary                            | Cakes, biscuits           | Cakes, biscuits                               |
| Sweet wheat bread filled                                                             | Yes                       | All cakes, biscuits classed as discretionary                            | Cakes, biscuits           | Cakes, biscuits                               |
| Wheat rusks                                                                          | Yes                       | All cakes, biscuits classed as discretionary                            | Cakes, biscuits           | Cakes, biscuits                               |
| Danish pastry filled w/ vanilla custard jam powdered sugar                           | Yes                       | All cakes, biscuits classed as discretionary                            | Cakes, biscuits           | Cakes, biscuits                               |
| Sweet wheat bread w/ saffron                                                         | Yes                       | All cakes, biscuits classed as discretionary                            | Cakes, biscuits           | Cakes, biscuits                               |
| Filled wafers biscuits                                                               | Yes                       | All cakes, biscuits classed as discretionary                            | Cakes, biscuits           | Cakes, biscuits                               |
| American chocolate cookies                                                           | Yes                       | All cakes, biscuits classed as discretionary                            | Cakes, biscuits           | Cakes, biscuits                               |
| Gingerbread biscuits                                                                 | Yes                       | All cakes, biscuits classed as discretionary                            | Cakes, biscuits           | Cakes, biscuits                               |
| Meringue                                                                             | Yes                       | All cakes, biscuits classed as discretionary                            | Cakes, biscuits           | Cakes, biscuits                               |
| Almond macaroons                                                                     | Yes                       | All cakes, biscuits classed as discretionary                            | Cakes, biscuits           | Cakes, biscuits                               |
| Layer cake filled w/ whipped cream vanilla custard raspberry jam covered w/ marzipan | Yes                       | All cakes, biscuits classed as discretionary                            | Cakes, biscuits           | Cakes, biscuits                               |
| Sweet wheat bun filled w/ whipped cream and almond paste                             | Yes                       | All cakes, biscuits classed as discretionary                            | Cakes, biscuits           | Cakes, biscuits                               |
| American muffins unspc.                                                              | Yes                       | All cakes, biscuits classed as discretionary                            | Cakes, biscuits           | Cakes, biscuits                               |
| Sponge cake gingerbread cake                                                         | Yes                       | All cakes, biscuits classed as discretionary                            | Cakes, biscuits           | Cakes, biscuits                               |
| Mums-mums raw meringue on wafer covered w/ chocolate                                 | Yes                       | All cakes, biscuits classed as discretionary                            | Cakes, biscuits           | Cakes, biscuits                               |
| Chocolate balls wholemeal                                                            | Yes                       | All cakes, biscuits classed as discretionary                            | Cakes, biscuits           | Cakes, biscuits                               |
| Carrot cake                                                                          | Yes                       | All cakes, biscuits classed as discretionary                            | Cakes, biscuits           | Cakes, biscuits                               |
| Muffin queen cake                                                                    | Yes                       | All cakes, biscuits classed as discretionary                            | Cakes, biscuits           | Cakes, biscuits                               |
| Chocolate mud cake                                                                   | Yes                       | All cakes, biscuits classed as discretionary                            | Cakes, biscuits           | Cakes, biscuits                               |
| Meringue cake (Pavlova)                                                              | Yes                       | All cakes, biscuits classed as discretionary                            | Cakes, biscuits           | Cakes, biscuits                               |
| Biscuit small                                                                        | Yes                       | All cakes, biscuits classed as discretionary                            | Cakes, biscuits           | Cakes, biscuits                               |
| Biscuit large                                                                        | Yes                       | All cakes, biscuits classed as discretionary                            | Cakes, biscuits           | Cakes, biscuits                               |
| Double biscuit                                                                       | Yes                       | All cakes, biscuits classed as discretionary                            | Cakes, biscuits           | Cakes, biscuits                               |
| Biscuit w/ chocolate coating                                                         | Yes                       | All cakes, biscuits classed as discretionary                            | Cakes, biscuits           | Cakes, biscuits                               |
| Cinnamon bun crescent                                                                | Yes                       | All cakes, biscuits classed as discretionary                            | Cakes, biscuits           | Cakes, biscuits                               |

**Supplementary File 1.** Foods classified as discretionary

| Food item                                                    | Classed as discretionary? | Decision was based on (with respect to the Australian definition)* | Original food group                          | Food group as used in analysis (if different) |
|--------------------------------------------------------------|---------------------------|--------------------------------------------------------------------|----------------------------------------------|-----------------------------------------------|
| Donut unspec.                                                | Yes                       | All cakes, biscuits classed as discretionary                       | Cakes, biscuits                              | Cakes, biscuits                               |
| Mazarin bisque punch roll                                    | Yes                       | All cakes, biscuits classed as discretionary                       | Cakes, biscuits                              | Cakes, biscuits                               |
| Cream cake                                                   | Yes                       | All cakes, biscuits classed as discretionary                       | Cakes, biscuits                              | Cakes, biscuits                               |
| Daim cake                                                    | Yes                       | All cakes, biscuits classed as discretionary                       | Cakes, biscuits                              | Cakes, biscuits                               |
| Brownie                                                      | Yes                       | All cakes, biscuits classed as discretionary                       | Cakes, biscuits                              | Cakes, biscuits                               |
| Camembert cheese white mould ripened deep-fried              | Yes                       | Cheese that is deep-fried classed as discretionary                 | Cheese dish                                  |                                               |
| Halloumi cheese fried or grilled                             | No                        |                                                                    | Cheese dish                                  |                                               |
| Chili cheese                                                 | Yes                       | Cheese dish/vegetable that is deep-fried classed as discretionary  | Cheese dish                                  |                                               |
| Tofu soya bean curd                                          | No                        |                                                                    | Cheese with vegetable fat                    |                                               |
| Tofutti (creamy smooth) original                             | No                        |                                                                    | Cheese with vegetable fat                    |                                               |
| Hard cheese soy protein                                      | No                        |                                                                    | Cheese with vegetable fat                    |                                               |
| Chewing gum unspec.                                          | Yes                       | All chewing gum classed as discretionary                           | Chewing gum                                  |                                               |
| Dark chocolate cocoa >70%                                    | Yes                       | All sweets, chocolate classed as discretionary                     | Chocolate                                    | Sweets, chocolate                             |
| Chocolate bulk confectionary                                 | Yes                       | All sweets, chocolate classed as discretionary                     | Chocolate                                    | Sweets, chocolate                             |
| Chocolate w/ toffee center unspec.                           | Yes                       | All sweets, chocolate classed as discretionary                     | Chocolate                                    | Sweets, chocolate                             |
| Milk chocolate unspec.                                       | Yes                       | All sweets, chocolate classed as discretionary                     | Chocolate                                    | Sweets, chocolate                             |
| Irish Coffee                                                 | Yes                       | All alcoholic drinks classed as discretionary                      | Cider, soft drink with alcohol, drinks       |                                               |
| Cider vol. % 4.5                                             | Yes                       | All alcoholic drinks classed as discretionary                      | Cider, soft drink with alcohol, drinks       |                                               |
| Cider vol. % 2.25                                            | Yes                       | All alcoholic drinks classed as discretionary                      | Cider, soft drink with alcohol, drinks       |                                               |
| Long drink (ca 4-6 cl spirits)                               | Yes                       | All alcoholic drinks classed as discretionary                      | Cider, soft drink with alcohol, drinks       |                                               |
| Punch w/ wine                                                | Yes                       | All alcoholic drinks classed as discretionary                      | Cider, soft drink with alcohol, drinks       |                                               |
| Soft drink w/ alcohol vol. % 4-5                             | Yes                       | All alcoholic drinks classed as discretionary                      | Cider, soft drink with alcohol, drinks       |                                               |
| Milkshake chocolate strawberry                               | No                        |                                                                    | Cocoa milkdrink milkshake smothie w youghurt |                                               |
| Cocoa w/ milk fat 1,5%                                       | No                        |                                                                    | Cocoa milkdrink milkshake smothie w youghurt |                                               |
| Yoghurt drink 0.5% fat e.g. Yoggi Yalla!                     | No                        |                                                                    | Cocoa milkdrink milkshake smothie w youghurt |                                               |
| Smoothie w/ berries yoghurt banana juice                     | No                        |                                                                    | Cocoa milkdrink milkshake smothie w youghurt |                                               |
| Caramel frappuccino                                          | Yes                       | Milk with added sugar classed as discretionary                     | Cocoa milkdrink milkshake smothie w youghurt | Sugar-sweetened beverages                     |
| Coffee brewed                                                | No                        |                                                                    | Coffee infusion                              |                                               |
| Chai latte                                                   | Yes                       | Coffee with added sugar classed as discretionary                   | Coffee Tea with milk                         | Sugar-sweetened beverages                     |
| Caffè latte                                                  | No                        |                                                                    | Coffee Tea with milk                         |                                               |
| Sour cream fat 12%                                           | Yes                       | All very high-fat dairy products classed as discretionary          | Cream, creme fraiche                         |                                               |
| Whipped cream fat 40%                                        | Yes                       | All very high-fat dairy products classed as discretionary          | Cream, creme fraiche                         |                                               |
| Cooking cream fat 15%                                        | Yes                       | All very high-fat dairy products classed as discretionary          | Cream, creme fraiche                         |                                               |
| Creme fraiche                                                | Yes                       | All very high-fat dairy products classed as discretionary          | Cream, creme fraiche                         |                                               |
| Alternative cream from oats or soy beans                     | Yes                       | Classed as the non-vegetarian variant                              | Creme, creme fraiche                         |                                               |
| Crisp bread thin wheat barley sugar fibre c 3% Wasa Tunnbröd | No                        |                                                                    | Crisp bread                                  |                                               |
| Wheat wholemeal rusks                                        | No                        |                                                                    | Crisp bread                                  |                                               |
| Grissini Italian breadsticks                                 | No                        |                                                                    | Crisp bread                                  |                                               |
| Crisp bread wholegrain                                       | No                        |                                                                    | Crisp bread                                  |                                               |
| Crisp bread thin                                             | No                        |                                                                    | Crisp bread                                  |                                               |
| Crisp bread white                                            | No                        |                                                                    | Crisp bread                                  |                                               |
| Peanut doodles or rings                                      | Yes                       | All crisps, savoury snacks classed as discretionary                | Crisps, savoury snacks                       |                                               |
| Corn crisps                                                  | Yes                       | All crisps, savoury snacks classed as discretionary                | Crisps, savoury snacks                       |                                               |
| Cheese doodles (cheese-flavored cheese puffs)                | Yes                       | All crisps, savoury snacks classed as discretionary                | Crisps, savoury snacks                       |                                               |
| Salted sticks                                                | Yes                       | All crisps, savoury snacks classed as discretionary                | Crisps, savoury snacks                       |                                               |
| Popcorn microwave fat 22%                                    | Yes                       | All crisps, savoury snacks classed as discretionary                | Crisps, savoury snacks                       |                                               |
| Crisps flavoured 34% fat                                     | Yes                       | All crisps, savoury snacks classed as discretionary                | Crisps, savoury snacks                       |                                               |
| Mixed savory snacks                                          | Yes                       | All crisps, savoury snacks classed as discretionary                | Crisps, savoury snacks                       |                                               |

**Supplementary File 1.** Foods classified as discretionary

| Food item                                                                | Classed as discretionary? | Decision was based on (with respect to the Australian definition)* | Original food group          | Food group as used in analysis (if different) |
|--------------------------------------------------------------------------|---------------------------|--------------------------------------------------------------------|------------------------------|-----------------------------------------------|
| Crispy potato snacks                                                     | Yes                       | All crisps, savoury snacks classed as discretionary                | Crisps, savoury snacks       |                                               |
| Crisps shrimp taste                                                      | Yes                       | All crisps, savoury snacks classed as discretionary                | Crisps, savoury snacks       |                                               |
| Bread slices dipped in egg batter fried ('poor knights')                 | Yes                       | All desserts classed as discretionary                              | Desserts                     | Desserts, ice-cream                           |
| Glorified rice                                                           | Yes                       | All desserts classed as discretionary                              | Desserts                     | Desserts, ice-cream                           |
| Rice pudding                                                             | Yes                       | All desserts classed as discretionary                              | Desserts                     | Desserts, ice-cream                           |
| Meringues and whipped cream decorated w/ chocolate sauce 'court dessert' | Yes                       | All desserts classed as discretionary                              | Desserts                     | Desserts, ice-cream                           |
| Chocolate fool or chocolate pudding                                      | Yes                       | All desserts classed as discretionary                              | Desserts                     | Desserts, ice-cream                           |
| Lemon mousse                                                             | Yes                       | All desserts classed as discretionary                              | Desserts                     | Desserts, ice-cream                           |
| Rhubarb pie                                                              | Yes                       | All desserts classed as discretionary                              | Desserts                     | Desserts, ice-cream                           |
| Apple pie                                                                | Yes                       | All desserts classed as discretionary                              | Desserts                     | Desserts, ice-cream                           |
| Cheese cake w/ crust made of digestive biscuits                          | Yes                       | All desserts classed as discretionary                              | Desserts                     | Desserts, ice-cream                           |
| Sweet pie (pie as a dessert unspec.)                                     | Yes                       | All desserts classed as discretionary                              | Desserts                     | Desserts, ice-cream                           |
| Deep fried banana                                                        | Yes                       | All desserts classed as discretionary                              | Desserts                     | Desserts, ice-cream                           |
| Baked apples                                                             | Yes                       | All desserts classed as discretionary                              | Desserts                     | Desserts, ice-cream                           |
| Swedish cheesecake fat 7%                                                | Yes                       | All desserts classed as discretionary                              | Desserts                     | Desserts, ice-cream                           |
| Tiramisu                                                                 | Yes                       | All desserts classed as discretionary                              | Desserts                     | Desserts, ice-cream                           |
| Vanilla pudding Panna cotta                                              | Yes                       | All desserts classed as discretionary                              | Desserts                     | Desserts, ice-cream                           |
| Baklava                                                                  | Yes                       | All desserts classed as discretionary                              | Desserts                     | Desserts, ice-cream                           |
| Fruit berries w/ white chocolate gratinated                              | Yes                       | All desserts classed as discretionary                              | Desserts                     | Desserts, ice-cream                           |
| Meal replacment RTD e.g. Nutrilett                                       | Yes                       | All dietary supplements classed as discretionary                   | Dietary supplements          |                                               |
| Meal replacement bar e.g. Nutrilett                                      | Yes                       | All dietary supplements classed as discretionary                   | Dietary supplements          |                                               |
| Proteinbar                                                               | Yes                       | All dietary supplements classed as discretionary                   | Dietary supplements          |                                               |
| Protein supplement powder                                                | Yes                       | All dietary supplements classed as discretionary                   | Dietary supplements          |                                               |
| Recovery product Gainer-Pro powder                                       | Yes                       | All dietary supplements classed as discretionary                   | Dietary supplements          |                                               |
| Egg raw conventional                                                     | No                        |                                                                    | Egg                          |                                               |
| Egg fried conventional                                                   | No                        |                                                                    | Egg                          |                                               |
| Boiled egg conventional                                                  | No                        |                                                                    | Egg                          |                                               |
| Farmer's omelette                                                        | No                        |                                                                    | Egg products and dishes      |                                               |
| French omelette w/ water                                                 | No                        |                                                                    | Egg products and dishes      |                                               |
| Scrambled eggs w/o flour                                                 | No                        |                                                                    | Egg products and dishes      |                                               |
| Margarine liquid fat 80% fortified Milda                                 | No                        |                                                                    | Fat of mixed origin >=80%fat |                                               |
| Butter and rapeseed oil liquid                                           | Yes                       | Fat (oil with butter) classed as discretionary                     | Fat of mixed origin >=80%fat |                                               |
| Small yoghurt pot size                                                   | No                        |                                                                    | Fermented milk products      |                                               |
| Small yoghurt pot size w/ müsli                                          | No                        |                                                                    | Fermented milk products      |                                               |
| Tuna canned                                                              | No                        |                                                                    | Fish and shellfish           |                                               |
| Shellfish unspec.                                                        | No                        |                                                                    | Fish and shellfish           |                                               |
| Fish fingers breaded, fried                                              | Yes                       | Fish battered/crumbed and deep-fried classed as discretionary      | Fish and shellfish dishes    |                                               |
| Fish fritters or deep fried fish                                         | Yes                       | Fish battered/crumbed and deep-fried classed as discretionary      | Fish and shellfish dishes    |                                               |
| Shrimps deep fried restaurant                                            | Yes                       | Fish battered/crumbed and deep-fried classed as discretionary      | Fish and shellfish dishes    |                                               |
| White fish breaded and pan-fried                                         | Yes                       | Fish battered/crumbed and deep-fried classed as discretionary      | Fish and shellfish dishes    |                                               |
| Flatfish breaded pan-fried                                               | Yes                       | Fish battered/crumbed and deep-fried classed as discretionary      | Fish and shellfish dishes    |                                               |
| Cured salmon and potatoes baked in eggs                                  | No                        |                                                                    | Fish and shellfish dishes    |                                               |
| Salted herring and potatoes baked in eggs                                | No                        |                                                                    | Fish and shellfish dishes    |                                               |
| Sardines canned in tomato sauce                                          | No                        |                                                                    | Fish and shellfish dishes    |                                               |
| Mackerel fillets canned in tomato sauce                                  | No                        |                                                                    | Fish and shellfish dishes    |                                               |
| Baltic herring fermented                                                 | No                        |                                                                    | Fish and shellfish dishes    |                                               |
| Herring salted coated fried home-made                                    | No                        |                                                                    | Fish and shellfish dishes    |                                               |
| Herring breaded fried                                                    | No                        |                                                                    | Fish and shellfish dishes    |                                               |
| Fish balls w/ lobster sauce canned prepared                              | No                        |                                                                    | Fish and shellfish dishes    |                                               |
| Fish balls canned breaded fried                                          | No                        |                                                                    | Fish and shellfish dishes    |                                               |
| Fish paté w/ shellfish                                                   | No                        |                                                                    | Fish and shellfish dishes    |                                               |
| Fish au gratin w/ dill sauce mashed potatoes                             | No                        |                                                                    | Fish and shellfish dishes    |                                               |
| Sushi diff. kinds                                                        | No                        |                                                                    | Fish and shellfish dishes    |                                               |

**Supplementary File 1.** Foods classified as discretionary

| Food item                                                                                 | Classed as discretionary? | Decision was based on (with respect to the Australian definition)* | Original food group         | Food group as used in analysis (if different) |
|-------------------------------------------------------------------------------------------|---------------------------|--------------------------------------------------------------------|-----------------------------|-----------------------------------------------|
| Fish w/ almonds bread crumbs frozen                                                       | No                        |                                                                    | Fish and shellfish dishes   |                                               |
| Fish au gratin w/ mashed potatoes dill sauce frozen prepared                              | No                        |                                                                    | Fish and shellfish dishes   |                                               |
| Shrimps in thick white sauce                                                              | No                        |                                                                    | Fish and shellfish dishes   |                                               |
| Fish paste/paté                                                                           | No                        |                                                                    | Fish and shellfish dishes   |                                               |
| Fish and shellfish casserole                                                              | No                        |                                                                    | Fish and shellfish dishes   |                                               |
| Pickled herring w/ tomato sauce                                                           | No                        |                                                                    | Fish and shellfish dishes   |                                               |
| Pickled herring w/ sour cream                                                             | No                        |                                                                    | Fish and shellfish dishes   |                                               |
| Mix of egg, anchovy, red onion, creme fraiche, mayonnaise (individual recipes may differ) | No                        |                                                                    | Fish and shellfish dishes   |                                               |
| Pickled herring                                                                           | No                        |                                                                    | Fish and shellfish dishes   |                                               |
| Tuna and tomato sauce                                                                     | No                        |                                                                    | Fish and shellfish dishes   |                                               |
| Pickled herring mustard sauce drained                                                     | No                        |                                                                    | Fish and shellfish dishes   |                                               |
| Fish gratin                                                                               | No                        |                                                                    | Fish and shellfish dishes   |                                               |
| Croustades filled w/ mushroom stew or skagen mixture                                      | No                        |                                                                    | Fish and shellfish dishes   |                                               |
| Salmon fishballs, fish burger fried                                                       | No                        |                                                                    | Fish and shellfish dishes   |                                               |
| Sardines canned in oil                                                                    | No                        |                                                                    | Fish fresh frozen cooked    |                                               |
| White fish boiled                                                                         | No                        |                                                                    | Fish fresh frozen cooked    |                                               |
| Other fish boiled                                                                         | No                        |                                                                    | Fish fresh frozen cooked    |                                               |
| Eel baked home-made                                                                       | No                        |                                                                    | Fish fried                  |                                               |
| Salmon fried                                                                              | No                        |                                                                    | Fish fried                  |                                               |
| Baltic herring fried                                                                      | No                        |                                                                    | Fish fried                  |                                               |
| Salmon drawn smoked                                                                       | No                        |                                                                    | Fish smoked                 |                                               |
| Salmon cold smoked or dry salted                                                          | No                        |                                                                    | Fish smoked                 |                                               |
| Fermented milk strawberry flavour 2.7% fat                                                | No                        |                                                                    | Flavoured fermented milk    |                                               |
| Fermented milk skimmed strawberry flavour 0.5% fat                                        | No                        |                                                                    | Flavoured fermented milk    |                                               |
| Yoghurt flavoured full fat                                                                | No                        |                                                                    | Flavoured fermented milk    |                                               |
| Yoghurt flavoured light                                                                   | No                        |                                                                    | Flavoured fermented milk    |                                               |
| Rye crushed grains or flakes steamed wholemeal                                            | No                        |                                                                    | Flour starch bran           |                                               |
| Wheat germs                                                                               | No                        |                                                                    | Flour starch bran           |                                               |
| Bran                                                                                      | No                        |                                                                    | Flour starch bran           |                                               |
| Oats rolled oats                                                                          | No                        |                                                                    | Flour starch bran           |                                               |
| Feta cheese 25% fat                                                                       | No                        |                                                                    | Fresh cheese and quark      |                                               |
| Cream cheese fat 27% Philadelphia                                                         | No                        |                                                                    | Fresh cheese and quark      |                                               |
| Cream cheese extra lgt 5% fat Philadelphia                                                | No                        |                                                                    | Fresh cheese and quark      |                                               |
| Mozzarella cheese fat 20%                                                                 | No                        |                                                                    | Fresh cheese and quark      |                                               |
| Cottage cheese plain                                                                      | No                        |                                                                    | Fresh cheese and quark      |                                               |
| Cottage cheese flavoured                                                                  | No                        |                                                                    | Fresh cheese and quark      |                                               |
| Cottage cheese w/ fruits and nuts                                                         | No                        |                                                                    | Fresh cheese and quark      |                                               |
| Quark plain                                                                               | No                        |                                                                    | Fresh cheese and quark      |                                               |
| Quark flavoured                                                                           | No                        |                                                                    | Fresh cheese and quark      |                                               |
| Drinking quark                                                                            | No                        |                                                                    | Fresh cheese and quark      |                                               |
| Apricots dried                                                                            | No                        |                                                                    | Fruit and berries dried     |                                               |
| Dates dried                                                                               | No                        |                                                                    | Fruit and berries dried     |                                               |
| Figs dried                                                                                | No                        |                                                                    | Fruit and berries dried     |                                               |
| Prunes 32.5% moisture                                                                     | No                        |                                                                    | Fruit and berries dried     |                                               |
| Raisins                                                                                   | No                        |                                                                    | Fruit and berries dried     |                                               |
| Fruit dried and sweetened                                                                 | No                        |                                                                    | Fruit and berries dried     |                                               |
| Cranberries dried                                                                         | No                        |                                                                    | Fruit and berries dried     |                                               |
| Pineapple canned in juice                                                                 | No                        |                                                                    | Fruit and berries preserved |                                               |
| Fruits canned                                                                             | No                        |                                                                    | Fruit and berries preserved |                                               |
| Energy bar chocolate nuts Start                                                           | Yes                       | Classed as sweets, chocolate                                       | Fruit and nuts mixes bars   | Sweets, chocolate                             |
| Sesame biscuits                                                                           | Yes                       | Classed as sweets, chocolate                                       | Fruit and nuts mixes bars   | Sweets, chocolate                             |
| Plantains fried or deep fried                                                             | Yes                       | Fruit that is deep-fried classed as discretionary                  | Fruit fresh frozen          |                                               |
| Pomegranate                                                                               | No                        |                                                                    | Fruit fresh frozen          |                                               |
| Grapefruit                                                                                | No                        |                                                                    | Fruit fresh frozen          |                                               |
| Pineapple                                                                                 | No                        |                                                                    | Fruit fresh frozen          |                                               |
| Orange                                                                                    | No                        |                                                                    | Fruit fresh frozen          |                                               |
| Apricot                                                                                   | No                        |                                                                    | Fruit fresh frozen          |                                               |
| Banana                                                                                    | No                        |                                                                    | Fruit fresh frozen          |                                               |
| Lemon                                                                                     | No                        |                                                                    | Fruit fresh frozen          |                                               |
| Small citrus fruit clementines mandarins satsumas                                         | No                        |                                                                    | Fruit fresh frozen          |                                               |
| Figs                                                                                      | No                        |                                                                    | Fruit fresh frozen          |                                               |
| Kiwi fruit green                                                                          | No                        |                                                                    | Fruit fresh frozen          |                                               |
| Sweet cherries                                                                            | No                        |                                                                    | Fruit fresh frozen          |                                               |
| Lime                                                                                      | No                        |                                                                    | Fruit fresh frozen          |                                               |
| Mango                                                                                     | No                        |                                                                    | Fruit fresh frozen          |                                               |
| Passion fruit                                                                             | No                        |                                                                    | Fruit fresh frozen          |                                               |
| Peach                                                                                     | No                        |                                                                    | Fruit fresh frozen          |                                               |

**Supplementary File 1.** Foods classified as discretionary

| Food item                                      | Classed as discretionary? | Decision was based on (with respect to the Australian definition)*      | Original food group                         | Food group as used in analysis (if different) |
|------------------------------------------------|---------------------------|-------------------------------------------------------------------------|---------------------------------------------|-----------------------------------------------|
| Sharon                                         | No                        |                                                                         | Fruit fresh frozen                          |                                               |
| Plums                                          | No                        |                                                                         | Fruit fresh frozen                          |                                               |
| Pear                                           | No                        |                                                                         | Fruit fresh frozen                          |                                               |
| Grapes                                         | No                        |                                                                         | Fruit fresh frozen                          |                                               |
| Apple w/ skin                                  | No                        |                                                                         | Fruit fresh frozen                          |                                               |
| Fruit fresh                                    | No                        |                                                                         | Fruit fresh frozen                          |                                               |
| Citrus fruits                                  | No                        |                                                                         | Fruit fresh frozen                          |                                               |
| Fruit salad                                    | No                        |                                                                         | Fruit fresh frozen                          |                                               |
| Exotic fruit                                   | No                        |                                                                         | Fruit fresh frozen                          |                                               |
| Smoothie w/ fruits and berries                 | No                        |                                                                         | Fruit fresh frozen                          |                                               |
| Melon                                          | No                        |                                                                         | Fruit fresh frozen                          |                                               |
| Orange juice RTD                               | No                        |                                                                         | Fruit juices etc                            |                                               |
| Lemon juice fresh                              | No                        |                                                                         | Fruit juices etc                            |                                               |
| Grapefruit juice fresh                         | No                        |                                                                         | Fruit juices etc                            |                                               |
| Lime juice fresh                               | No                        |                                                                         | Fruit juices etc                            |                                               |
| Apple juice RTD                                | No                        |                                                                         | Fruit juices etc                            |                                               |
| Juice unspec.                                  | No                        |                                                                         | Fruit juices etc                            |                                               |
| Tropical juice RTD                             | No                        |                                                                         | Fruit juices etc                            |                                               |
| Cordial reduced sugar RTD                      | Yes                       | All sugar-sweetened beverages classed as discretionary                  | Fruit syrup soft drink, non-alcoholic cider | Sugar-sweetened beverages                     |
| Fruit syrup RTD                                | Yes                       | All sugar-sweetened beverages classed as discretionary                  | Fruit syrup soft drink, non-alcoholic cider | Sugar-sweetened beverages                     |
| Soft drinks carbonated                         | Yes                       | All sugar-sweetened beverages classed as discretionary                  | Fruit syrup soft drink, non-alcoholic cider | Sugar-sweetened beverages                     |
| Cola drink                                     | Yes                       | All sugar-sweetened beverages classed as discretionary                  | Fruit syrup soft drink, non-alcoholic cider | Sugar-sweetened beverages                     |
| Apple cowberry drink RTD fortified             | Yes                       | All sugar-sweetened beverages classed as discretionary                  | Fruit syrup soft drink, non-alcoholic cider | Sugar-sweetened beverages                     |
| Ice tea RTD                                    | Yes                       | All sugar-sweetened beverages classed as discretionary                  | Fruit syrup soft drink, non-alcoholic cider | Sugar-sweetened beverages                     |
| Cider non-alcoholic                            | Yes                       | All sugar-sweetened beverages classed as discretionary                  | Fruit syrup soft drink, non-alcoholic cider | Sugar-sweetened beverages                     |
| Fruit syrup soft drink non-carbonated          | Yes                       | All sugar-sweetened beverages classed as discretionary                  | Fruit syrup soft drink, non-alcoholic cider | Sugar-sweetened beverages                     |
| Nectar w/ spices "gluhwein"                    | Yes                       | All sugar-sweetened beverages classed as discretionary                  | Fruit syrup soft drink, non-alcoholic cider | Sugar-sweetened beverages                     |
| Nectars RTD                                    | Yes                       | All sugar-sweetened beverages classed as discretionary                  | Fruit syrup soft drink, non-alcoholic cider | Sugar-sweetened beverages                     |
| Cranberry drink RTD                            | Yes                       | All sugar-sweetened beverages classed as discretionary                  | Fruit syrup soft drink, non-alcoholic cider | Sugar-sweetened beverages                     |
| Corn flour polenta boiled                      | No                        |                                                                         | Grain bulgur, couscous                      |                                               |
| Buckwheat w/ salt                              | No                        |                                                                         | Grain bulgur, couscous                      |                                               |
| Quinoa red boiled w/ salt                      | No                        |                                                                         | Grain bulgur, couscous                      |                                               |
| Bulgur boiled regular and wholegrain           | No                        |                                                                         | Grain bulgur, couscous                      |                                               |
| Grains boiled                                  | No                        |                                                                         | Grain bulgur, couscous                      |                                               |
| Couscous boiled                                | No                        |                                                                         | Grain bulgur, couscous                      |                                               |
| Gruel for adults wholemeal fortified           | No                        |                                                                         | Gruel                                       |                                               |
| Chicken burger Mac Donalds                     | No                        |                                                                         | Hamburger with bread                        |                                               |
| Fish burger Mac Donalds                        | No                        |                                                                         | Hamburger with bread                        |                                               |
| Vegetarian burger w/ bread salad sauce         | No                        |                                                                         | Hamburger with bread                        |                                               |
| Hamburger big mac whopper frisco               | No                        |                                                                         | Hamburger with bread                        |                                               |
| Hamburger small                                | No                        |                                                                         | Hamburger with bread                        |                                               |
| Hamburger large big tasty super cheese n bacon | Yes                       | Hamburger with more than 5g saturated fat/100g classed as discretionary | Hamburger with bread                        |                                               |
| Hamburger w/o bread                            | Yes                       | Hamburger with more than 5g saturated fat/100g classed as discretionary | Hamburger with bread                        |                                               |
| Hard cheese fat 17%                            | No                        |                                                                         | Hard cheese                                 |                                               |
| Parmesan hard cheese grated 30% fat            | No                        |                                                                         | Hard cheese                                 |                                               |
| Cheese fat 27%                                 | No                        |                                                                         | Hard cheese                                 |                                               |
| Ice cream in chocolate wafers GB Sandwich      | Yes                       | All ice-cream classed as discretionary                                  | Ice cream                                   | Desserts, ice-cream                           |
| Soft ice cream vanilla                         | Yes                       | All ice-cream classed as discretionary                                  | Ice cream                                   | Desserts, ice-cream                           |
| Ice cream cake fat 17%                         | Yes                       | All ice-cream classed as discretionary                                  | Ice cream                                   | Desserts, ice-cream                           |
| Sorbet                                         | Yes                       | All ice-cream classed as discretionary                                  | Ice cream                                   | Desserts, ice-cream                           |
| Ice cream mix                                  | Yes                       | All ice-cream classed as discretionary                                  | Ice cream                                   | Desserts, ice-cream                           |
| Ice cream in cup                               | Yes                       | All ice-cream classed as discretionary                                  | Ice cream                                   | Desserts, ice-cream                           |
| Ice cream bars                                 | Yes                       | All ice-cream classed as discretionary                                  | Ice cream                                   | Desserts, ice-cream                           |
| Soft ice cream in cone                         | Yes                       | All ice-cream classed as discretionary                                  | Ice cream                                   | Desserts, ice-cream                           |
| Ice lolly small                                | Yes                       | All ice-cream classed as discretionary                                  | Ice cream                                   | Desserts, ice-cream                           |
| Ice lolly big                                  | Yes                       | All ice-cream classed as discretionary                                  | Ice cream                                   | Desserts, ice-cream                           |
| Ice cream cone big                             | Yes                       | All ice-cream classed as discretionary                                  | Ice cream                                   | Desserts, ice-cream                           |
| Ice cream cone small                           | Yes                       | All ice-cream classed as discretionary                                  | Ice cream                                   | Desserts, ice-cream                           |
| Ice cream yoghurt ice cream                    | Yes                       | All ice-cream classed as discretionary                                  | Ice cream                                   | Desserts, ice-cream                           |
| Milk free Ice Cream                            | Yes                       | All ice-cream classed as discretionary                                  | Ice cream                                   | Desserts, ice-cream                           |

**Supplementary File 1.** Foods classified as discretionary

| Food item                                       | Classed as discretionary? | Decision was based on (with respect to the Australian definition)*                 | Original food group       | Food group as used in analysis (if different) |
|-------------------------------------------------|---------------------------|------------------------------------------------------------------------------------|---------------------------|-----------------------------------------------|
| Ice cream cone                                  | Yes                       | All ice-cream classed as discretionary                                             | Ice cream                 | Desserts, ice-cream                           |
| Ice cream Ben & Jerrys                          | Yes                       | All ice-cream classed as discretionary                                             | Ice cream                 | Desserts, ice-cream                           |
| Ice lolly unspec.                               | Yes                       | All ice-cream classed as discretionary                                             | Ice cream                 | Desserts, ice-cream                           |
| Ice cream cake round                            | Yes                       | All ice-cream classed as discretionary                                             | Ice cream                 | Desserts, ice-cream                           |
| Black currant jelly                             | Yes                       | All jam etc classed as discretionary                                               | Jam, marmelade            |                                               |
| Cowberry/lingonberry jam                        | Yes                       | All jam etc classed as discretionary                                               | Jam, marmelade            |                                               |
| Apple sauce                                     | Yes                       | All jam etc classed as discretionary                                               | Jam, marmelade            |                                               |
| Cumberland sauce                                | Yes                       | All jam etc classed as discretionary                                               | Jam, marmelade            |                                               |
| Chutney                                         | Yes                       | All jam etc classed as discretionary                                               | Jam, marmelade            |                                               |
| Jam, strawberry, raspberry and blueberry        | Yes                       | All jam etc classed as discretionary                                               | Jam, marmelade            |                                               |
| Jam orange, apricot and raspberry               | Yes                       | All jam etc classed as discretionary                                               | Jam, marmelade            |                                               |
| Green peas                                      | No                        |                                                                                    | Leguminous plant          |                                               |
| Sugar pea boiled w/ salt                        | No                        |                                                                                    | Leguminous plant          |                                               |
| Chickpeas canned                                | No                        |                                                                                    | Leguminous plant          |                                               |
| Lentils dried boiled w/ salt                    | No                        |                                                                                    | Leguminous plant          |                                               |
| Beans tinned                                    | No                        |                                                                                    | Leguminous plant          |                                               |
| Green beans unspec.                             | No                        |                                                                                    | Leguminous plant          |                                               |
| Sprouts unspec.                                 | No                        |                                                                                    | Leguminous plant          |                                               |
| Pasta made of beans                             | No                        |                                                                                    | Leguminous plant          |                                               |
| Liqueur sweet vol. % 24                         | Yes                       | All alcoholic drinks classed as discretionary                                      | Liqueur                   |                                               |
| Cucumber mayonnaise or cucumber salad fast food | Yes                       | All mayonnaise salads classed as discretionary                                     | Mayonnaise salad          |                                               |
| Shrimp mayonnaise or shrimp salad fast food     | Yes                       | All mayonnaise salads classed as discretionary                                     | Mayonnaise salad          |                                               |
| Mimosa salad w/ fruit                           | Yes                       | All mayonnaise salads classed as discretionary                                     | Mayonnaise salad          |                                               |
| Shellfish and mayonnaise mix                    | Yes                       | All mayonnaise salads classed as discretionary                                     | Mayonnaise salad          |                                               |
| Tapenade                                        | Yes                       | All mayonnaise salads classed as discretionary                                     | Mayonnaise salad          |                                               |
| Chicken in a mayonnaise/sour cream based sauce  | Yes                       | All mayonnaise salads classed as discretionary                                     | Mayonnaise salad          |                                               |
| Beetroot salad mayonnaise                       | Yes                       | All mayonnaise salads classed as discretionary                                     | Mayonnaise salad          |                                               |
| Tuna mayonnaise salad                           | Yes                       | All mayonnaise salads classed as discretionary                                     | Mayonnaise salad          |                                               |
| Sailor's beef home-made                         | No                        |                                                                                    | Meat products meat dishes |                                               |
| Lobscouse corned beef and mashed potatoes       | No                        |                                                                                    | Meat products meat dishes |                                               |
| Cabbage pudding                                 | No                        |                                                                                    | Meat products meat dishes |                                               |
| Moussaka                                        | No                        |                                                                                    | Meat products meat dishes |                                               |
| Chilli con carne                                | No                        |                                                                                    | Meat products meat dishes |                                               |
| Beef rolls fried                                | No                        |                                                                                    | Meat products meat dishes |                                               |
| Wiener schnitzel pork                           | No                        |                                                                                    | Meat products meat dishes |                                               |
| Reindeer thin slices casserole                  | No                        |                                                                                    | Meat products meat dishes |                                               |
| Minced meat filling for taco shells             | No                        |                                                                                    | Meat products meat dishes |                                               |
| Country paté                                    | No                        |                                                                                    | Meat products meat dishes |                                               |
| Kebab spec. w/ french fries                     | No                        |                                                                                    | Meat products meat dishes |                                               |
| Beef stew w/ beef and pork                      | No                        |                                                                                    | Meat products meat dishes |                                               |
| Minced meat gratin e.g. taco gratin             | No                        |                                                                                    | Meat products meat dishes |                                               |
| Skewer w/ meat and vegetables                   | No                        |                                                                                    | Meat products meat dishes |                                               |
| Pork meat fried                                 | No                        |                                                                                    | Meat products meat dishes |                                               |
| Steak tartare                                   | No                        |                                                                                    | Meat products meat dishes |                                               |
| Meat loaf oven baked                            | No                        |                                                                                    | Meat products meat dishes |                                               |
| Meat balls pan fried                            | No                        |                                                                                    | Meat products meat dishes |                                               |
| Patty pan fried                                 | No                        |                                                                                    | Meat products meat dishes |                                               |
| Minced meat rolls pan fried                     | No                        |                                                                                    | Meat products meat dishes |                                               |
| Minced meat sauce                               | No                        |                                                                                    | Meat products meat dishes |                                               |
| Döner kebab fried                               | No                        |                                                                                    | Meat products meat dishes |                                               |
| Pulled pork roasted                             | No                        |                                                                                    | Meat products meat dishes |                                               |
| Dumplings w/ pork shrimp                        | No                        |                                                                                    | Meat products meat dishes |                                               |
| Lamb curry                                      | No                        |                                                                                    | Meat products meat dishes |                                               |
| Nacho plate                                     | Yes                       | Cereal-based product with more than 5g saturated fat/100g classed as discretionary | Meat products meat dishes |                                               |
| Nacho plate large                               | Yes                       | Cereal-based product with more than 5g saturated fat/100g classed as discretionary | Meat products meat dishes |                                               |
| Skimmed milk powder fat 1%                      | No                        |                                                                                    | Milk                      |                                               |
| Milk low-fat                                    | No                        |                                                                                    | Milk                      |                                               |
| Milk medium-fat                                 | No                        |                                                                                    | Milk                      |                                               |
| Milk fat >3%                                    | No                        |                                                                                    | Milk                      |                                               |
| Milk w/ extra protein 0.5% fat                  | No                        |                                                                                    | Milk                      |                                               |
| Milk flavoured extra protein 1.5% fat           | No                        |                                                                                    | Milk                      |                                               |
| Condensed milk sweetened canned fat ca 9%       | Yes                       | Milk with added sugar classed as discretionary                                     | Milk                      |                                               |
| Butter fat 60-80 %                              | Yes                       | Fat, high fat, classed as discretionary                                            | Mixed origin spread       |                                               |
| Margarine fat 60-80%                            | No                        |                                                                                    | Mixed origin spread       |                                               |
| Margarine fat 40-60%                            | No                        |                                                                                    | Mixed origin spread       |                                               |

**Supplementary File 1.** Foods classified as discretionary

| Food item                                          | Classed as discretionary? | Decision was based on (with respect to the Australian definition)*    | Original food group                        | Food group as used in analysis (if different) |
|----------------------------------------------------|---------------------------|-----------------------------------------------------------------------|--------------------------------------------|-----------------------------------------------|
| Chicken salad w/ dressing                          | No                        |                                                                       | Mixed salad                                |                                               |
| Greek sallad                                       | No                        |                                                                       | Mixed salad                                |                                               |
| Tabbouleh                                          | No                        |                                                                       | Mixed salad                                |                                               |
| Pasta salad w/ chicken                             | No                        |                                                                       | Mixed salad                                |                                               |
| Chicken salad                                      | No                        |                                                                       | Mixed salad                                |                                               |
| Shellfish salad shrimp salad                       | No                        |                                                                       | Mixed salad                                |                                               |
| Salad w/ salmon or other fish                      | No                        |                                                                       | Mixed salad                                |                                               |
| Tuna salad                                         | No                        |                                                                       | Mixed salad                                |                                               |
| Cheese and ham salad                               | No                        |                                                                       | Mixed salad                                |                                               |
| Roast beef salad                                   | No                        |                                                                       | Mixed salad                                |                                               |
| Salad w/ beans chickpeas                           | No                        |                                                                       | Mixed salad                                |                                               |
| Pasta salad w/ cheese and ham                      | No                        |                                                                       | Mixed salad                                |                                               |
| Pasta salad w/ roast beef or other meat            | No                        |                                                                       | Mixed salad                                |                                               |
| Pasta salad w/ shrimps or other types of shellfish | No                        |                                                                       | Mixed salad                                |                                               |
| Pasta salad w/ salmon or other fish                | No                        |                                                                       | Mixed salad                                |                                               |
| Pasta salad w/ tuna                                | No                        |                                                                       | Mixed salad                                |                                               |
| Pasta salad w/ beans chickpeas                     | No                        |                                                                       | Mixed salad                                |                                               |
| Salad w/ bulgur and falafel                        | No                        |                                                                       | Mixed salad                                |                                               |
| Salad w/ chevré                                    | No                        |                                                                       | Mixed salad                                |                                               |
| Taco salad                                         | No                        |                                                                       | Mixed salad                                |                                               |
| Mushrooms                                          | No                        |                                                                       | Mushroom                                   |                                               |
| Mushrooms fried                                    | No                        |                                                                       | Mushroom                                   |                                               |
| Chanterelles fried                                 | No                        |                                                                       | Mushroom                                   |                                               |
| Mushroom fried                                     | No                        |                                                                       | Mushroom                                   |                                               |
| Dip for chicken nuggets                            | Yes                       | Most dressings, sauces classed as discretionary                       | Mustard ketchup HP sauce soja "flavouring" |                                               |
| Tomato chili sauce                                 | Yes                       | Most dressings, sauces classed as discretionary                       | Mustard ketchup HP sauce soja "flavouring" |                                               |
| Tomato ketchup                                     | Yes                       | Most dressings, sauces classed as discretionary                       | Mustard ketchup HP sauce soja "flavouring" |                                               |
| HP-sauce                                           | Yes                       | Most dressings, sauces classed as discretionary                       | Mustard ketchup HP sauce soja "flavouring" |                                               |
| Mustard Swedish                                    | Yes                       | Most dressings, sauces classed as discretionary                       | Mustard ketchup HP sauce soja "flavouring" |                                               |
| Sweet chili sauce                                  | Yes                       | Most dressings, sauces classed as discretionary                       | Mustard ketchup HP sauce soja "flavouring" |                                               |
| Teryaki sauce Japanese                             | Yes                       | Most dressings, sauces classed as discretionary                       | Mustard ketchup HP sauce soja "flavouring" |                                               |
| Soy sauce                                          | No                        |                                                                       | Mustard ketchup HP sauce soja "flavouring" |                                               |
| Fermented milk fat 3%                              | No                        |                                                                       | Natural fermented products                 |                                               |
| Fermented milk skimmed fat 0.5%                    | No                        |                                                                       | Natural fermented products                 |                                               |
| Yoghurt natural fat 3%                             | No                        |                                                                       | Natural fermented products                 |                                               |
| Fermented milk semi-skimmed fat 1.5%               | No                        |                                                                       | Natural fermented products                 |                                               |
| Yoghurt natural skimmed fat 0.5%                   | No                        |                                                                       | Natural fermented products                 |                                               |
| Greek or Turkish yoghurt 10% fat                   | No                        |                                                                       | Natural fermented products                 |                                               |
| Yoghurt for cooking                                | No                        |                                                                       | Natural fermented products                 |                                               |
| Peanuts dried                                      | No                        |                                                                       | Nuts and seeds                             |                                               |
| Peanuts roasted salted                             | No                        |                                                                       | Nuts and seeds                             |                                               |
| Shredded coconut dried                             | No                        |                                                                       | Nuts and seeds                             |                                               |
| Almonds dried                                      | No                        |                                                                       | Nuts and seeds                             |                                               |
| Mixed nuts salted                                  | No                        |                                                                       | Nuts and seeds                             |                                               |
| Mixed nuts                                         | No                        |                                                                       | Nuts and seeds                             |                                               |
| Nuts and dried fruits berries                      | No                        |                                                                       | Nuts and seeds                             |                                               |
| Almond                                             | No                        |                                                                       | Nuts and seeds                             |                                               |
| Seeds                                              | No                        |                                                                       | Nuts and seeds                             |                                               |
| Peanut butter                                      | No                        |                                                                       | Nuts and seeds                             |                                               |
| Chili peanuts                                      | No                        | Classed as nuts                                                       | Nuts and seeds                             |                                               |
| Almonds candied                                    | Yes                       | Classed as sweets, chocolate                                          | Nuts and seeds                             | Sweets, chocolate                             |
| Liver patties fried home-made                      | No                        |                                                                       | Offal products and dishes                  |                                               |
| Liver pan fried                                    | No                        |                                                                       | Offal products and dishes                  |                                               |
| Liver casserole unspec.                            | No                        |                                                                       | Offal products and dishes                  |                                               |
| Hash made w/ eg barley offal heated fried          | Yes                       | Classed as sausage with more than 5g saturated fat/100g discretionary | Offal products and dishes                  |                                               |
| Offals                                             | No                        |                                                                       | Offals                                     |                                               |
| Coconut butter                                     | Yes                       |                                                                       | Other fats (lard, tallow, coconut oil)     |                                               |
| Pancakes thin home-made                            | No                        |                                                                       | Panncake,                                  |                                               |
| Pancake thin filled unspec.                        | No                        |                                                                       | Panncake,                                  |                                               |
| Pancake thick pancake w/ fried pork                | No                        |                                                                       | Panncake,                                  |                                               |
| Waffles plain or egg waffles                       | No                        |                                                                       | Panncake,                                  |                                               |
| Pasta boiled w/ salt                               | No                        |                                                                       | pasta                                      |                                               |
| Pasta whole grain >50% boiled w/ salt              | No                        |                                                                       | pasta                                      |                                               |

**Supplementary File 1.** Foods classified as discretionary

| Food item                                                                                               | Classed as discretionary? | Decision was based on (with respect to the Australian definition)*                 | Original food group             | Food group as used in analysis (if different) |
|---------------------------------------------------------------------------------------------------------|---------------------------|------------------------------------------------------------------------------------|---------------------------------|-----------------------------------------------|
| Noodles boiled                                                                                          | No                        |                                                                                    | pasta                           |                                               |
| Stir fry vegetables w/ chicken noodles                                                                  | No                        |                                                                                    | Pasta dishes                    |                                               |
| Stir fry vegetables w/ noodles                                                                          | No                        |                                                                                    | Pasta dishes                    |                                               |
| Pasta macaroni in thick white sauce                                                                     | No                        |                                                                                    | Pasta dishes                    |                                               |
| Pasta ravioli w/ sauce frozen or canned                                                                 | No                        |                                                                                    | Pasta dishes                    |                                               |
| Tortellini w/ meat filling                                                                              | No                        |                                                                                    | Pasta dishes                    |                                               |
| Lasagne veg.                                                                                            | No                        |                                                                                    | Pasta dishes                    |                                               |
| Lasagna w/ minced beef or beef and pork mince                                                           | No                        |                                                                                    | Pasta dishes                    |                                               |
| Pasta au gratin w/ cheese sauce and ham                                                                 | No                        |                                                                                    | Pasta dishes                    |                                               |
| Stir-fried noodles w/ meat, chicken or sausage                                                          | No                        |                                                                                    | Pasta dishes                    |                                               |
| Pasta gratin                                                                                            | No                        |                                                                                    | Pasta dishes                    |                                               |
| Pasta carbonara                                                                                         | No                        |                                                                                    | Pasta dishes                    |                                               |
| Ciabatta sandwich w/ mozzarella cheese sundried tomatoes and green salad                                | No                        |                                                                                    | Pies, pizza, toasted sandwiches |                                               |
| Spring roll frozen heated                                                                               | No                        |                                                                                    | Pies, pizza, toasted sandwiches |                                               |
| Pirogue filled w/ minced meat                                                                           | No                        |                                                                                    | Pies, pizza, toasted sandwiches |                                               |
| Pitta bread w/ falafel green salad sesame and pepperoni                                                 | No                        |                                                                                    | Pies, pizza, toasted sandwiches |                                               |
| Savory muffin coarse wholemeal flour w/ goat's or sheep's cheese broccoli spinach and sundried tomatoes | No                        |                                                                                    | Pies, pizza, toasted sandwiches |                                               |
| Savory sandwich layer-cake filled w/ liver paté cottage cheese ham                                      | No                        |                                                                                    | Pies, pizza, toasted sandwiches |                                               |
| Döner kebab                                                                                             | No                        |                                                                                    | Pies, pizza, toasted sandwiches |                                               |
| Bagel w/ spread                                                                                         | No                        |                                                                                    | Pies, pizza, toasted sandwiches |                                               |
| French roll w/ spread                                                                                   | No                        |                                                                                    | Pies, pizza, toasted sandwiches |                                               |
| Focaccia w/ spread                                                                                      | No                        |                                                                                    | Pies, pizza, toasted sandwiches |                                               |
| Wrap w/ spread                                                                                          | No                        |                                                                                    | Pies, pizza, toasted sandwiches |                                               |
| Sandwich w/ spread                                                                                      | No                        |                                                                                    | Pies, pizza, toasted sandwiches |                                               |
| Baguette sub w/ spread                                                                                  | No                        |                                                                                    | Pies, pizza, toasted sandwiches |                                               |
| Subway sandwich                                                                                         | No                        |                                                                                    | Pies, pizza, toasted sandwiches |                                               |
| Enchiladas                                                                                              | No                        |                                                                                    | Pies, pizza, toasted sandwiches |                                               |
| Wheat crisp bread sandwich average diff. fillings                                                       | Yes                       | Cereal-based product with more than 5g saturated fat/100g classed as discretionary | Pies, pizza, toasted sandwiches |                                               |
| Vegetarian pirogue                                                                                      | Yes                       | Cereal-based product with more than 5g saturated fat/100g classed as discretionary | Pies, pizza, toasted sandwiches |                                               |
| Toast w/ spread                                                                                         | Yes                       | Cereal-based product with more than 5g saturated fat/100g classed as discretionary | Pies, pizza, toasted sandwiches |                                               |
| Grilled sandwich w/ spread                                                                              | Yes                       | Cereal-based product with more than 5g saturated fat/100g classed as discretionary | Pies, pizza, toasted sandwiches |                                               |
| Meat pie                                                                                                | Yes                       | Pies with more than 5g saturated fat/100g classed as discretionary                 | Pies, pizza, toasted sandwiches |                                               |
| Chicken pie                                                                                             | Yes                       | Pies with more than 5g saturated fat/100g classed as discretionary                 | Pies, pizza, toasted sandwiches |                                               |
| Shellfish pie frozen heated                                                                             | Yes                       | Pies with more than 5g saturated fat/100g classed as discretionary                 | Pies, pizza, toasted sandwiches |                                               |
| Cheese and ham pie                                                                                      | Yes                       | Pies with more than 5g saturated fat/100g classed as discretionary                 | Pies, pizza, toasted sandwiches |                                               |
| Cheese pie                                                                                              | Yes                       | Pies with more than 5g saturated fat/100g classed as discretionary                 | Pies, pizza, toasted sandwiches |                                               |
| Vegetable pie                                                                                           | Yes                       | Pies with more than 5g saturated fat/100g classed as discretionary                 | Pies, pizza, toasted sandwiches |                                               |
| Vegetarian pie w/ quorn                                                                                 | Yes                       | Pies with more than 5g saturated fat/100g classed as discretionary                 | Pies, pizza, toasted sandwiches |                                               |
| Puff pastry or filo pastry baked cheese                                                                 | Yes                       | Pies with more than 5g saturated fat/100g classed as discretionary                 | Pies, pizza, toasted sandwiches |                                               |
| Pizza homemade                                                                                          | No                        |                                                                                    | Pies, pizza, toasted sandwiches |                                               |
| Pizza frozen or chilled                                                                                 | No                        |                                                                                    | Pies, pizza, toasted sandwiches |                                               |
| Pizza pan pizza smoked pork frozen heated                                                               | Yes                       | Pizza with more than 5g saturated fat/100g classed as discretionary                | Pies, pizza, toasted sandwiches |                                               |
| Pizza unspec.                                                                                           | Yes                       | Pizza with more than 5g saturated fat/100g classed as discretionary                | Pies, pizza, toasted sandwiches |                                               |
| Mini pizzas w/ ham cheese tomatoes and/or other fillings                                                | Yes                       | Pizza with more than 5g saturated fat/100g classed as discretionary                | Pies, pizza, toasted sandwiches |                                               |
| Rice porridge                                                                                           | No                        |                                                                                    | Porridge                        |                                               |
| Oatmeal porridge wholemeal                                                                              | No                        |                                                                                    | Porridge                        |                                               |
| Semolina porridge                                                                                       | No                        |                                                                                    | Porridge                        |                                               |
| Porridge multigrain                                                                                     | No                        |                                                                                    | Porridge                        |                                               |
| Rice porridge e.g. Risifrutti Manna                                                                     | Yes                       | Classed as dessert                                                                 | Porridge                        | Desserts, ice-cream                           |
| Rice pudding w/ fruit sauce e.g. Risifrutti original                                                    | Yes                       | Classed as dessert                                                                 | Porridge                        | Desserts, ice-cream                           |



**Supplementary File 1.** Foods classified as discretionary

| Food item                                                                          | Classed as discretionary? | Decision was based on (with respect to the Australian definition)*        | Original food group          | Food group as used in analysis (if different) |
|------------------------------------------------------------------------------------|---------------------------|---------------------------------------------------------------------------|------------------------------|-----------------------------------------------|
| Old potato boiled w/ salt                                                          | No                        |                                                                           | Potatoes                     |                                               |
| Potato w/ skins unsalted baked                                                     | No                        |                                                                           | Potatoes                     |                                               |
| Potato wedges w/ skin oven-baked in rapeseed oil                                   | No                        |                                                                           | Potatoes                     |                                               |
| Pressed potatoes                                                                   | No                        |                                                                           | Potatoes                     |                                               |
| New potatoe boiled w/ salt                                                         | No                        |                                                                           | Potatoes                     |                                               |
| Potato fried                                                                       | No                        |                                                                           | Potatoes                     |                                               |
| Potato dumplings stuffed w/ chopped pork                                           | No                        |                                                                           | Potatoes products and dishes |                                               |
| Potato salad w/ sour cream mayonnaise                                              | No                        |                                                                           | Potatoes products and dishes |                                               |
| Potato salad w/ vinaigrette                                                        | No                        |                                                                           | Potatoes products and dishes |                                               |
| Potato pancakes home-made                                                          | No                        |                                                                           | Potatoes products and dishes |                                               |
| Potatoes creamed                                                                   | No                        |                                                                           | Potatoes products and dishes |                                               |
| Potato patties                                                                     | No                        |                                                                           | Potatoes products and dishes |                                               |
| Mashed potatoes                                                                    | No                        |                                                                           | Potatoes products and dishes |                                               |
| Mashed potatoes instant powder fortified prepared                                  | No                        |                                                                           | Potatoes products and dishes |                                               |
| Potatoes au gratin w/ cream and cheese frozen heated                               | No                        |                                                                           | Potatoes products and dishes |                                               |
| Potato gnocchi                                                                     | No                        |                                                                           | Potatoes products and dishes |                                               |
| Swedish chicken hash                                                               | No                        |                                                                           | Potatoes products and dishes |                                               |
| Swedish hash in cast iron frying pan home-made                                     | Yes                       | Potato dish with more than 5g saturated fat/100g classed as discretionary | Potatoes products and dishes |                                               |
| Potatoes and vegetables fried                                                      | Yes                       | Potato dish with more than 5g saturated fat/100g classed as discretionary | Potatoes products and dishes |                                               |
| Swiss potato cake rösti frozen heated                                              | Yes                       | Potato dish with more than 5g saturated fat/100g classed as discretionary | Potatoes products and dishes |                                               |
| Potato croquettes frozen heated                                                    | Yes                       | Potato dish with more than 5g saturated fat/100g classed as discretionary | Potatoes products and dishes |                                               |
| Potatoes ovenbaked w/ butter, salt and breadcrumbs                                 | Yes                       | Potato dish with more than 5g saturated fat/100g classed as discretionary | Potatoes products and dishes |                                               |
| French fries                                                                       | Yes                       | Potato dish with more than 5g saturated fat/100g classed as discretionary | Potatoes products and dishes |                                               |
| Swedish potato gratin w/ pickled sprats coffee cream and milk Jansson's temptation | Yes                       | Potato dish with more than 5g saturated fat/100g classed as discretionary | Potatoes products and dishes |                                               |
| Potatoes au gratin w/ ham or other meat                                            | Yes                       | Potato dish with more than 5g saturated fat/100g classed as discretionary | Potatoes products and dishes |                                               |
| Duck roasted                                                                       | No                        |                                                                           | Poultry                      |                                               |
| Chicken hen boiled grilled fried                                                   | No                        |                                                                           | Poultry                      |                                               |
| Smoked turkey                                                                      | No                        |                                                                           | Poultry                      |                                               |
| Game bird boiled                                                                   | No                        |                                                                           | Poultry                      |                                               |
| Fajitas chicken                                                                    | No                        |                                                                           | Poultry products and dishes  |                                               |
| Quesadillas                                                                        | No                        |                                                                           | Poultry products and dishes  |                                               |
| Chicken meat balls fat 12% fried frozen                                            | No                        |                                                                           | Poultry products and dishes  |                                               |
| Chicken au gratin w/ bananas bacon and peanuts (Flygande Jacob)                    | No                        |                                                                           | Poultry products and dishes  |                                               |
| Chicken casserole w/ cream/crème fraîche                                           | No                        |                                                                           | Poultry products and dishes  |                                               |
| Chicken stew w/ tomato                                                             | No                        |                                                                           | Poultry products and dishes  |                                               |
| Pulled chicken roasted                                                             | No                        |                                                                           | Poultry products and dishes  |                                               |
| Chicken curry stew                                                                 | No                        |                                                                           | Poultry products and dishes  |                                               |
| Chicken deep-fried Chicken McNuggets                                               | Yes                       | Poultry that is battered and deep-fried classed as discretionary          | Poultry products and dishes  |                                               |
| Processed cheese                                                                   | No                        |                                                                           | Processed cheese             |                                               |
| Liver paste or paté slicable fat c 26%                                             | No                        |                                                                           | Processed meat               |                                               |
| Horse meat smoked                                                                  | Yes                       | All processed meat classed as discretionary                               | Processed meat               |                                               |
| Beef meat cured boiled                                                             | Yes                       | All processed meat classed as discretionary                               | Processed meat               |                                               |
| Reindeer meat dried                                                                | Yes                       | All processed meat classed as discretionary                               | Processed meat               |                                               |
| Bacon pork fried                                                                   | Yes                       | All processed meat classed as discretionary                               | Processed meat               |                                               |
| Italian prosciutto cured air-dried ham pork                                        | Yes                       | All processed meat classed as discretionary                               | Processed meat               |                                               |
| Smoked ham pork fat 1-3% sliced                                                    | Yes                       | All processed meat classed as discretionary                               | Processed meat               |                                               |
| Cured ham Christmas ham pork fat 4.5% boiled                                       | Yes                       | All processed meat classed as discretionary                               | Processed meat               |                                               |
| Pork loin smoked fried or heated                                                   | Yes                       | All processed meat classed as discretionary                               | Processed meat               |                                               |
| Cured pork belly fried                                                             | Yes                       | All processed meat classed as discretionary                               | Processed meat               |                                               |
| Smoked meat                                                                        | Yes                       | All processed meat classed as discretionary                               | Processed meat               |                                               |
| Boiled ham                                                                         | Yes                       | All processed meat classed as discretionary                               | Processed meat               |                                               |
| Beef cube roll fried                                                               | No                        |                                                                           | Red meat fresh frozen cooked |                                               |
| Spare ribs pork barbecued                                                          | No                        |                                                                           | Red meat fresh frozen cooked |                                               |
| Top round steak fried (thin slices)                                                | No                        |                                                                           | Red meat fresh frozen cooked |                                               |
| Roasted steak                                                                      | No                        |                                                                           | Red meat fresh frozen cooked |                                               |
| Meat thin slices pan-fried                                                         | No                        |                                                                           | Red meat fresh frozen cooked |                                               |
| Lamb racks                                                                         | No                        |                                                                           | Red meat fresh frozen cooked |                                               |

**Supplementary File 1.** Foods classified as discretionary

| Food item                                                 | Classed as discretionary? | Decision was based on (with respect to the Australian definition)* | Original food group          | Food group as used in analysis (if different) |
|-----------------------------------------------------------|---------------------------|--------------------------------------------------------------------|------------------------------|-----------------------------------------------|
| Meat unspec. boiled                                       | No                        |                                                                    | Red meat fresh frozen cooked |                                               |
| Beef carpaccio                                            | No                        |                                                                    | Red meat fresh frozen cooked |                                               |
| Minced meat unspec. Fried                                 | No                        |                                                                    | Red meat fresh frozen cooked |                                               |
| Chops loin collar chops pan fried                         | No                        |                                                                    | Red meat fresh frozen cooked |                                               |
| Loin pan fried                                            | No                        |                                                                    | Red meat fresh frozen cooked |                                               |
| Steak pan fried                                           | No                        |                                                                    | Red meat fresh frozen cooked |                                               |
| Meat grilled                                              | No                        |                                                                    | Red meat fresh frozen cooked |                                               |
| Pulled beef                                               | No                        |                                                                    | Red meat fresh frozen cooked |                                               |
| Rice cake                                                 | No                        |                                                                    | Rice cakes                   |                                               |
| Paella                                                    | No                        |                                                                    | Rice dishes                  |                                               |
| Rice persian                                              | No                        |                                                                    | Rice dishes                  |                                               |
| Fried rice w/ meat chicken or sausage                     | No                        |                                                                    | Rice dishes                  |                                               |
| Rice w/ onion pilaff rice                                 | No                        |                                                                    | Rice dishes                  |                                               |
| Italian risotto w/ parmesan cheese                        | No                        |                                                                    | Rice dishes                  |                                               |
| Wild rice boiled                                          | No                        |                                                                    | Rice rice noodles            |                                               |
| Rice diff. kinds boiled w/ salt                           | No                        |                                                                    | Rice rice noodles            |                                               |
| Cellophane noodles boiled w/ salt                         | No                        |                                                                    | Rice rice noodles            |                                               |
| Long-grain brown rice boiled                              | No                        |                                                                    | Rice rice noodles            |                                               |
| Fish spawn                                                | No                        | Classed as fish                                                    | Roe, roe spread              |                                               |
| Fish spawn paste spread smoked                            | No                        | Classed as fish                                                    | Roe, roe spread              |                                               |
| Beetroot pan-fried or stir-fried                          | No                        |                                                                    | Root vegetables              |                                               |
| Vegetables and root vegetables baked                      | No                        |                                                                    | Root vegetables              |                                               |
| Ginger pickles                                            | No                        |                                                                    | Root vegetables              |                                               |
| Mixed vegetables carrot parsnip leek celeriac boiled      | No                        |                                                                    | Root vegetables              |                                               |
| Sweet potato fried                                        | No                        |                                                                    | Root vegetables              |                                               |
| Swede fried or woked                                      | No                        |                                                                    | Root vegetables              |                                               |
| Wasabi                                                    | No                        |                                                                    | Root vegetables              |                                               |
| Swede                                                     | No                        |                                                                    | Root vegetables              |                                               |
| Carrot                                                    | No                        |                                                                    | Root vegetables              |                                               |
| Horseradish                                               | No                        |                                                                    | Root vegetables              |                                               |
| Radish                                                    | No                        |                                                                    | Root vegetables              |                                               |
| Beetroot                                                  | No                        |                                                                    | Root vegetables              |                                               |
| Beetroots pickled drained                                 | No                        |                                                                    | Root vegetables              |                                               |
| Carrot pan-fried or stir-fried                            | No                        |                                                                    | Root vegetables              |                                               |
| Celeriac pan-fried or stir-fried                          | No                        |                                                                    | Root vegetables              |                                               |
| Plain wafers                                              | No                        |                                                                    | Salty biscuits               |                                               |
| Cracker small                                             | Yes                       | Savoury biscuit with more than 1800 kJ/100g                        | Salty biscuits               |                                               |
| Cracker semi-sweet biscuit big                            | Yes                       | Savoury biscuit with more than 1800 kJ/100g                        | Salty biscuits               |                                               |
| Mushrooms in white sauce                                  | No                        |                                                                    | Sauces, dressings            |                                               |
| White sauce béchamel                                      | No                        |                                                                    | Sauces, dressings            |                                               |
| Blue cheese sauce made w/ coffee cream and whipping cream | No                        |                                                                    | Sauces, dressings            |                                               |
| Tomato sauce                                              | No                        |                                                                    | Sauces, dressings            |                                               |
| Carbonara                                                 | No                        |                                                                    | Sauces, dressings            |                                               |
| Cheese and ham sauce                                      | No                        |                                                                    | Sauces, dressings            |                                               |
| Cheese sauce ready-made sauce fat 8%                      | No                        |                                                                    | Sauces, dressings            |                                               |
| Shellfish sauce                                           | No                        |                                                                    | Sauces, dressings            |                                               |
| Mayonnaise 90% fat                                        | Yes                       | Most dressings, sauces classed as discretionary                    | Sauces, dressings            |                                               |
| Sauce (mustard based) for raw spiced salmon               | Yes                       | Most dressings, sauces classed as discretionary                    | Sauces, dressings            |                                               |
| Rémoulade sauce                                           | Yes                       | Most dressings, sauces classed as discretionary                    | Sauces, dressings            |                                               |
| Vinaigrette w/ water 45% fat                              | Yes                       | Most dressings, sauces classed as discretionary                    | Sauces, dressings            |                                               |
| Béarnaise sauce                                           | Yes                       | Most dressings, sauces classed as discretionary                    | Sauces, dressings            |                                               |
| Rhode Island sauce                                        | Yes                       | Most dressings, sauces classed as discretionary                    | Sauces, dressings            |                                               |
| Egg sauce w/ parsley                                      | Yes                       | Most dressings, sauces classed as discretionary                    | Sauces, dressings            |                                               |
| Pesto sauce w/ basil pine nuts and cashew nuts            | Yes                       | Most dressings, sauces classed as discretionary                    | Sauces, dressings            |                                               |
| Peanut sauce                                              | Yes                       | Most dressings, sauces classed as discretionary                    | Sauces, dressings            |                                               |
| Curry sauce RTE refrigerated/frozen                       | Yes                       | Most dressings, sauces classed as discretionary                    | Sauces, dressings            |                                               |
| Hamburger dressing                                        | Yes                       | Most dressings, sauces classed as discretionary                    | Sauces, dressings            |                                               |
| Barbeque sauce                                            | Yes                       | Most dressings, sauces classed as discretionary                    | Sauces, dressings            |                                               |
| Whipped cream w/ horseradish                              | Yes                       | Most dressings, sauces classed as discretionary                    | Sauces, dressings            |                                               |

**Supplementary File 1.** Foods classified as discretionary

| Food item                                                       | Classed as discretionary? | Decision was based on (with respect to the Australian definition)* | Original food group                 | Food group as used in analysis (if different) |
|-----------------------------------------------------------------|---------------------------|--------------------------------------------------------------------|-------------------------------------|-----------------------------------------------|
| Cesar dressing                                                  | Yes                       | Most dressings, sauces classed as discretionary                    | Sauces, dressings                   |                                               |
| Aioli mayonnaise                                                | Yes                       | Most dressings, sauces classed as discretionary                    | Sauces, dressings                   |                                               |
| Dip for french fries bearnaise                                  | Yes                       | Most dressings, sauces classed as discretionary                    | Sauces, dressings                   |                                               |
| Pizza topping sauce                                             | Yes                       | Most dressings, sauces classed as discretionary                    | Sauces, dressings                   |                                               |
| Garlic sauce                                                    | Yes                       | Most dressings, sauces classed as discretionary                    | Sauces, dressings                   |                                               |
| Brown sauce w/ milk                                             | No                        |                                                                    | Sauces, dressings                   |                                               |
| Thin gravy                                                      | No                        |                                                                    | Sauces, dressings                   |                                               |
| Tomato sauce Mexican style                                      | No                        | Classed as vegetable**                                             | Sauces, dressings                   |                                               |
| Cold sauce school coleslaw                                      | No                        | Classed as vegetable**                                             | Sauces, dressings                   |                                               |
| Tzatziki                                                        | No                        | Classed as yoghurt**                                               | Sauces, dressings                   |                                               |
| Yoghurt sauce                                                   | No                        | Classed as yoghurt**                                               | Sauces, dressings                   |                                               |
| Sausage Stroganoff w/ cooking cream                             | Yes                       | Sausage with more than 5g saturated fat classed as discretionary   | Sausage dishes                      |                                               |
| Sausage casserole w/ sausage chorizo vegetables root vegetables | Yes                       | Sausage with more than 5g saturated fat classed as discretionary   | Sausage dishes                      |                                               |
| Hot dog frankfurter made of chicken turkey or ostrich boiled    | No                        |                                                                    | Sausages                            |                                               |
| Sausage meat 48% boiled e.g. fläskkorv                          | Yes                       | Sausage with more than 5g saturated fat classed as discretionary   | Sausages                            |                                               |
| Salami sausage fat 33% smoked                                   | Yes                       | Sausage with more than 5g saturated fat classed as discretionary   | Sausages                            |                                               |
| Sausage meat 73% fried e.g. Chorizo                             | Yes                       | Sausage with more than 5g saturated fat classed as discretionary   | Sausages                            |                                               |
| Salami imported fat 45%                                         | Yes                       | Sausage with more than 5g saturated fat classed as discretionary   | Sausages                            |                                               |
| Sausage ('Falu' sausage) pan-fried                              | Yes                       | Sausage with more than 5g saturated fat classed as discretionary   | Sausages                            |                                               |
| Sausage fermented meat fried 59% e.g. Smäländska isterband      | Yes                       | Sausage with more than 5g saturated fat classed as discretionary   | Sausages                            |                                               |
| Sausage hot dog fried                                           | Yes                       | Sausage with more than 5g saturated fat classed as discretionary   | Sausages                            |                                               |
| Sausage for sandwich unspec.                                    | Yes                       | Sausage with more than 5g saturated fat classed as discretionary   | Sausages                            |                                               |
| Miniature frankfurter('Prince' sausage) pan-fried               | Yes                       | Sausage with more than 5g saturated fat classed as discretionary   | Sausages                            |                                               |
| Shrimps raw                                                     | No                        |                                                                    | Shellfish squid fresh frozen cooked |                                               |
| White bread wheat scones                                        | Yes                       | Classed as cakes, biscuits                                         | Soft bread                          | Cakes, biscuits                               |
| Croissant                                                       | Yes                       | Classed as cakes, biscuits                                         | Soft bread                          | Cakes, biscuits                               |
| White bread e.g. pita fibre c 3.5%                              | No                        |                                                                    | Soft bread                          |                                               |
| Hot dog bun                                                     | No                        |                                                                    | Soft bread                          |                                               |
| White bread e.g. Italian unsweetened fibre c 2.5%               | No                        |                                                                    | Soft bread                          |                                               |
| Baguette white bread wheat                                      | No                        |                                                                    | Soft bread                          |                                               |
| White bread tortilla fibre 4.6%                                 | No                        |                                                                    | Soft bread                          |                                               |
| Bread soft thin w/ milk fibre c 4%                              | No                        |                                                                    | Soft bread                          |                                               |
| Bagel                                                           | No                        |                                                                    | Soft bread                          |                                               |
| Croutons, plain                                                 | No                        |                                                                    | Soft bread                          |                                               |
| White bread fibre c 5% e.g. Jättefranska                        | No                        |                                                                    | Soft bread                          |                                               |
| Hamburger bread                                                 | No                        |                                                                    | Soft bread                          |                                               |
| Indian naan bread                                               | No                        |                                                                    | Soft bread                          |                                               |
| Bread deep fried e.g. langos                                    | No                        |                                                                    | Soft bread                          |                                               |
| Semi whole grain bread                                          | No                        |                                                                    | Soft bread                          |                                               |
| Tea biscuit                                                     | No                        |                                                                    | Soft bread                          |                                               |
| Whole grain bread                                               | No                        |                                                                    | Soft bread                          |                                               |
| Camembert cheese white mould ripened low fat fat 11%            | No                        |                                                                    | Soft cheese                         |                                               |
| Cheese chèvre french goat milk white mold ripened fat 25%       | No                        |                                                                    | Soft cheese                         |                                               |
| Cheese for dessert                                              | No                        |                                                                    | Soft cheese                         |                                               |
| Vegetable soup w/ cream                                         | No                        |                                                                    | Soup                                |                                               |
| Instant noodles soup diff. flavours                             | No                        |                                                                    | Soup                                |                                               |
| Pea soup w/ pork canned prepared w/ water                       | No                        |                                                                    | Soup                                |                                               |
| Lentil soup                                                     | No                        |                                                                    | Soup                                |                                               |
| Pea soup veg.                                                   | No                        |                                                                    | Soup                                |                                               |
| Beef soup                                                       | No                        |                                                                    | Soup                                |                                               |
| Chicken soup clear                                              | No                        |                                                                    | Soup                                |                                               |
| Instant chicken soup cream of cooked w/ water e.g. Varma koppen | No                        |                                                                    | Soup                                |                                               |
| Fish soup                                                       | No                        |                                                                    | Soup                                |                                               |
| Miso soup w/ tofu                                               | No                        |                                                                    | Soup                                |                                               |

**Supplementary File 1.** Foods classified as discretionary

| Food item                                                 | Classed as discretionary? | Decision was based on (with respect to the Australian definition)* | Original food group                             | Food group as used in analysis (if different) |
|-----------------------------------------------------------|---------------------------|--------------------------------------------------------------------|-------------------------------------------------|-----------------------------------------------|
| Vegetable paste Tartex                                    | No                        | Classed as the non-vegetarian variant                              | Soy and wheat protein quorn products and dishes |                                               |
| Soya sausage                                              | No                        | Classed as the non-vegetarian variant                              | Soy and wheat protein quorn products and dishes |                                               |
| Vegetarian lasagne                                        | No                        | Classed as the non-vegetarian variant                              | Soy and wheat protein quorn products and dishes |                                               |
| Vegetarian moussaka                                       | No                        | Classed as the non-vegetarian variant                              | Soy and wheat protein quorn products and dishes |                                               |
| Vegetarian schnitzel                                      | No                        | Classed as the non-vegetarian variant                              | Soy and wheat protein quorn products and dishes |                                               |
| Vegetarian swedish hash                                   | No                        | Classed as the non-vegetarian variant                              | Soy and wheat protein quorn products and dishes |                                               |
| Vegetarian filet                                          | No                        | Classed as the non-vegetarian variant                              | Soy and wheat protein quorn products and dishes |                                               |
| Vegetarian nuggets                                        | Yes                       | Classed as the non-vegetarian variant                              | Soy and wheat protein quorn products and dishes |                                               |
| Vegetarian balls                                          | No                        | Classed as the non-vegetarian variant                              | Soy and wheat protein quorn products and dishes |                                               |
| Vegetarian bolognese sauce                                | No                        | Classed as the non-vegetarian variant                              | Soy and wheat protein quorn products and dishes |                                               |
| Vegetarian stew                                           | No                        | Classed as the non-vegetarian variant                              | Soy and wheat protein quorn products and dishes |                                               |
| Vegetarian beef                                           | No                        | Classed as the non-vegetarian variant                              | Soy and wheat protein quorn products and dishes |                                               |
| Vegetarian minced quorn soy                               | No                        | Classed as the non-vegetarian variant                              | Soy and wheat protein quorn products and dishes |                                               |
| Cinnamon                                                  | No                        |                                                                    | Spices                                          |                                               |
| Vodka or snaps vol. % 40                                  | Yes                       | All alcoholic drinks classed as discretionary                      | Spirits                                         |                                               |
| Energy drink e.g. Red Bull fortified                      | Yes                       | All sugar-sweetened beverages classed as discretionary             | Sports drinks, energy drinks                    | Sugar-sweetened beverages                     |
| Sugar                                                     | Yes                       | All sugar, honey etc classed as discretionary                      | Sugar, syrup, honey                             |                                               |
| Golden syrup                                              | Yes                       | All sugar, honey etc classed as discretionary                      | Sugar, syrup, honey                             |                                               |
| Honey                                                     | Yes                       | All sugar, honey etc classed as discretionary                      | Sugar, syrup, honey                             |                                               |
| Glucose                                                   | Yes                       | All sugar, honey etc classed as discretionary                      | Sugar, syrup, honey                             |                                               |
| Stewed fruit and berries                                  | Yes                       | All sweet soups, sauces classed as discretionary                   | Sweet soups, sauces                             | Desserts, ice-cream                           |
| Fruit syrup sauce thickened w/ potato starch              | Yes                       | All sweet soups, sauces classed as discretionary                   | Sweet soups, sauces                             | Desserts, ice-cream                           |
| Fruit drink blueberry                                     | Yes                       | All sweet soups, sauces classed as discretionary                   | Sweet soups, sauces                             | Desserts, ice-cream                           |
| Fruit soup                                                | Yes                       | All sweet soups, sauces classed as discretionary                   | Sweet soups, sauces                             | Desserts, ice-cream                           |
| Rosehip soup RTE pasteurised or powder prepared fortified | Yes                       | All sweet soups, sauces classed as discretionary                   | Sweet soups, sauces                             | Desserts, ice-cream                           |
| Soup fruit berries sweetener unspec.                      | Yes                       | All sweet soups, sauces classed as discretionary                   | Sweet soups, sauces                             | Desserts, ice-cream                           |
| Chocolate sauce                                           | Yes                       | All sweet soups, sauces classed as discretionary                   | Sweet soups, sauces                             | Desserts, ice-cream                           |
| Butterscotch sauce                                        | Yes                       | All sweet soups, sauces classed as discretionary                   | Sweet soups, sauces                             | Desserts, ice-cream                           |
| Custard                                                   | Yes                       | All sweet soups, sauces classed as discretionary                   | Sweet soups, sauces                             | Desserts, ice-cream                           |
| Berry sauce                                               | Yes                       | All sweet soups, sauces classed as discretionary                   | Sweet soups, sauces                             | Desserts, ice-cream                           |
| Lollipop                                                  | Yes                       | All sweets, chocolate classed as discretionary                     | Sweets excluding chocolate                      | Sweets, chocolate                             |
| Candy straps cane                                         | Yes                       | All sweets, chocolate classed as discretionary                     | Sweets excluding chocolate                      | Sweets, chocolate                             |
| Bulk confectionary in small box                           | Yes                       | All sweets, chocolate classed as discretionary                     | Sweets excluding chocolate                      | Sweets, chocolate                             |
| Chocolate hazelnut spread Nutella                         | Yes                       | All sweets, chocolate classed as discretionary                     | Sweets miscellaneous                            | Sweets, chocolate                             |
| Chocolate bar filled wafers covered w/ milk chocolate     | Yes                       | All sweets, chocolate classed as discretionary                     | Sweets miscellaneous                            | Sweets, chocolate                             |
| Cereal bar enriched e.g. Special K Bar Chocolate          | Yes                       | All sweets, chocolate classed as discretionary                     | Sweets miscellaneous                            | Sweets, chocolate                             |
| Bulk confectionary                                        | Yes                       | All sweets, chocolate classed as discretionary                     | Sweets miscellaneous                            | Sweets, chocolate                             |
| Nature candy                                              | Yes                       | All sweets, chocolate classed as discretionary                     | Sweets miscellaneous                            | Sweets, chocolate                             |
| Pastilles sugar free                                      | Yes                       | All sugar-free sweets classed as discretionary                     | Sweets sugar-free                               |                                               |
| Taco shells                                               | No                        |                                                                    | Taco shell                                      |                                               |
| Tea brewed                                                | No                        |                                                                    | Tea infusion                                    |                                               |
| Carrot juice                                              | No                        |                                                                    | Vegetable juice                                 |                                               |

**Supplementary File 1.** Foods classified as discretionary

| Food item                                                      | Classed as discretionary? | Decision was based on (with respect to the Australian definition)* | Original food group                                             | Food group as used in analysis (if different) |
|----------------------------------------------------------------|---------------------------|--------------------------------------------------------------------|-----------------------------------------------------------------|-----------------------------------------------|
| Tomato juice canned RTD                                        | No                        |                                                                    | Vegetable juice                                                 |                                               |
| Vegetable juice canned or pasteurised RTD                      | No                        |                                                                    | Vegetable juice                                                 |                                               |
| Stir-fry vegetable mix Classic wokked in rapeseed oil          | No                        |                                                                    | Vegetable mixes w root vegetables and or leguminous plants      |                                               |
| Peas and carrots boiled                                        | No                        |                                                                    | Vegetable mixes w root vegetables and or leguminous plants      |                                               |
| Mixed vegetables and root crops fried                          | No                        |                                                                    | Vegetable mixes w root vegetables and or leguminous plants      |                                               |
| Olive oil                                                      | No                        |                                                                    | Vegetable oils                                                  |                                               |
| Rapeseed oil                                                   | No                        |                                                                    | Vegetable oils                                                  |                                               |
| Oat milk soy milk                                              | No                        | Classed as the non-vegetarian variant                              | Vegetable products and milk replacement                         |                                               |
| Oatgurt Soygurt milkfree yoghurt                               | No                        | Classed as the non-vegetarian variant                              | Vegetable products and milk replacement                         |                                               |
| Avocado                                                        | No                        |                                                                    | Vegetables excluding potatoes                                   |                                               |
| Celery                                                         | No                        |                                                                    | Vegetables excluding potatoes                                   |                                               |
| Cauliflower                                                    | No                        |                                                                    | Vegetables excluding potatoes                                   |                                               |
| Fennel                                                         | No                        |                                                                    | Vegetables excluding potatoes                                   |                                               |
| Kale                                                           | No                        |                                                                    | Vegetables excluding potatoes                                   |                                               |
| Cucumber                                                       | No                        |                                                                    | Vegetables excluding potatoes                                   |                                               |
| Iceberg lettuce                                                | No                        |                                                                    | Vegetables excluding potatoes                                   |                                               |
| Onions yellow                                                  | No                        |                                                                    | Vegetables excluding potatoes                                   |                                               |
| Leek                                                           | No                        |                                                                    | Vegetables excluding potatoes                                   |                                               |
| Red cabbage                                                    | No                        |                                                                    | Vegetables excluding potatoes                                   |                                               |
| Chinese cabbage                                                | No                        |                                                                    | Vegetables excluding potatoes                                   |                                               |
| Summer squash                                                  | No                        |                                                                    | Vegetables excluding potatoes                                   |                                               |
| Tomato                                                         | No                        |                                                                    | Vegetables excluding potatoes                                   |                                               |
| Cabbage                                                        | No                        |                                                                    | Vegetables excluding potatoes                                   |                                               |
| Lettuce mixed cucumber tomato w/o dressing                     | No                        |                                                                    | Vegetables excluding potatoes                                   |                                               |
| Sweet peppers green yellow red                                 | No                        |                                                                    | Vegetables excluding potatoes                                   |                                               |
| Corn kernels canned drained                                    | No                        |                                                                    | Vegetables excluding potatoes                                   |                                               |
| Olives green marinated drained                                 | No                        |                                                                    | Vegetables excluding potatoes                                   |                                               |
| Sauerkraut canned whole contents                               | No                        |                                                                    | Vegetables excluding potatoes                                   |                                               |
| Chopped tomatoes canned whole contents                         | No                        |                                                                    | Vegetables excluding potatoes                                   |                                               |
| Salad lettuce mix w/ cucumber tomato sweet pepper w/o dressing | No                        |                                                                    | Vegetables excluding potatoes                                   |                                               |
| Onion fried                                                    | No                        |                                                                    | Vegetables excluding potatoes                                   |                                               |
| Spinach fried w/o browning                                     | No                        |                                                                    | Vegetables excluding potatoes                                   |                                               |
| Aubergine fried                                                | No                        |                                                                    | Vegetables excluding potatoes                                   |                                               |
| Cucumber pickled                                               | No                        |                                                                    | Vegetables excluding potatoes                                   |                                               |
| Globe artichoke boiled                                         | No                        |                                                                    | Vegetables excluding potatoes                                   |                                               |
| Corn cobs boiled                                               | No                        |                                                                    | Vegetables excluding potatoes                                   |                                               |
| Cauliflower pan-fried or stir-fried                            | No                        |                                                                    | Vegetables excluding potatoes                                   |                                               |
| Fennel pan-fried or stir-fried                                 | No                        |                                                                    | Vegetables excluding potatoes                                   |                                               |
| Sweet/bell pepper grilled, pan-fried or stir-fried             | No                        |                                                                    | Vegetables excluding potatoes                                   |                                               |
| Pumpkin or marrow pan-fried or stir-fried                      | No                        |                                                                    | Vegetables excluding potatoes                                   |                                               |
| Leek pan-fried or stir-fried                                   | No                        |                                                                    | Vegetables excluding potatoes                                   |                                               |
| White cabbage pan-fried or stir-fried                          | No                        |                                                                    | Vegetables excluding potatoes                                   |                                               |
| Salad, various kinds                                           | No                        |                                                                    | Vegetables excluding potatoes                                   |                                               |
| Sprouts                                                        | No                        |                                                                    | Vegetables excluding potatoes                                   |                                               |
| Lettuce mixed cucumber tomato corn w/ out dressing             | No                        |                                                                    | Vegetables excluding potatoes                                   |                                               |
| Vegetables braised                                             | No                        |                                                                    | Vegetables excluding potatoes                                   |                                               |
| Asparagus fried or wokked                                      | No                        |                                                                    | Vegetables excluding potatoes                                   |                                               |
| Corn fried                                                     | No                        |                                                                    | Vegetables excluding potatoes                                   |                                               |
| Brussels sprouts fried or wokked                               | No                        |                                                                    | Vegetables excluding potatoes                                   |                                               |
| Tomato fried                                                   | No                        |                                                                    | Vegetables excluding potatoes                                   |                                               |
| Broccoli boiled                                                | No                        |                                                                    | Vegetables excluding potatoes                                   |                                               |
| Spinach Mangold                                                | No                        |                                                                    | Vegetables excluding potatoes                                   |                                               |
| Herbs                                                          | No                        |                                                                    | Vegetables excluding potatoes                                   |                                               |
| Guacamole                                                      | No                        |                                                                    | Vegetables excluding potatoes                                   |                                               |
| Coconut water natural or flavoured                             | No                        |                                                                    | Vegetables excluding potatoes                                   |                                               |
| Vegetable salad w/ carrot cabbage etc                          | No                        |                                                                    | Vegetables leguminous plant root vegetables dishes and products |                                               |
| Vegetables unspec. deep fried                                  | No                        |                                                                    | Vegetables leguminous plant root vegetables dishes and products |                                               |

**Supplementary File 1.** Foods classified as discretionary

| Food item                                                   | Classed as discretionary? | Decision was based on (with respect to the Australian definition)* | Original food group                                             | Food group as used in analysis (if different) |
|-------------------------------------------------------------|---------------------------|--------------------------------------------------------------------|-----------------------------------------------------------------|-----------------------------------------------|
| Vegetable paté                                              | No                        |                                                                    | Vegetables leguminous plant root vegetables dishes and products |                                               |
| Vegetable gratin                                            | No                        |                                                                    | Vegetables leguminous plant root vegetables dishes and products |                                               |
| Root vegetable gratin                                       | No                        |                                                                    | Vegetables leguminous plant root vegetables dishes and products |                                               |
| Burrito                                                     | No                        |                                                                    | Vegetables leguminous plant root vegetables dishes and products |                                               |
| Mashed swedes and potatoes home-made                        | No                        |                                                                    | Vegetables leguminous plant root vegetables dishes and products |                                               |
| Sundried tomatoes marinated in oil                          | No                        |                                                                    | Vegetables leguminous plant root vegetables dishes and products |                                               |
| Ajvar relish vegetable paste w/ sweet peppers and aubergine | No                        |                                                                    | Vegetables leguminous plant root vegetables dishes and products |                                               |
| Vegetable patties fried                                     | No                        |                                                                    | Vegetables leguminous plant root vegetables dishes and products |                                               |
| Cabbage red and apples fried boiled                         | No                        |                                                                    | Vegetables leguminous plant root vegetables dishes and products |                                               |
| Mushrooms in thick white sauce                              | No                        |                                                                    | Vegetables leguminous plant root vegetables dishes and products |                                               |
| Cabbage salad Swedish pizza salad                           | No                        |                                                                    | Vegetables leguminous plant root vegetables dishes and products |                                               |
| Vegetables in thick white sauce                             | No                        |                                                                    | Vegetables leguminous plant root vegetables dishes and products |                                               |
| Vegetable casserole unspec.                                 | No                        |                                                                    | Vegetables leguminous plant root vegetables dishes and products |                                               |
| Cucumber mix pickled                                        | No                        |                                                                    | Vegetables leguminous plant root vegetables dishes and products |                                               |
| Vegetables mixed fermented                                  | No                        |                                                                    | Vegetables leguminous plant root vegetables dishes and products |                                               |
| Wine leaves stuffed w/ rice canned                          | No                        |                                                                    | Vegetables leguminous plant root vegetables dishes and products |                                               |
| White beans baked in tomato sauce canned                    | No                        |                                                                    | Vegetables leguminous plant root vegetables dishes and products |                                               |
| Falafel chickpea-croquettes frozen                          | No                        |                                                                    | Vegetables leguminous plant root vegetables dishes and products |                                               |
| Ratatouille                                                 | No                        |                                                                    | Vegetables leguminous plant root vegetables dishes and products |                                               |
| Vegetarian casserole w/ beans and lentils                   | No                        |                                                                    | Vegetables leguminous plant root vegetables dishes and products |                                               |
| Marinated beans                                             | No                        |                                                                    | Vegetables leguminous plant root vegetables dishes and products |                                               |
| Marinated lentils                                           | No                        |                                                                    | Vegetables leguminous plant root vegetables dishes and products |                                               |
| Marinated chickpeas                                         | No                        |                                                                    | Vegetables leguminous plant root vegetables dishes and products |                                               |
| Marinated garlic                                            | No                        |                                                                    | Vegetables leguminous plant root vegetables dishes and products |                                               |
| Aubergine mix                                               | No                        |                                                                    | Vegetables leguminous plant root vegetables dishes and products |                                               |
| Hummus dip/spread made from chickpeas                       | No                        |                                                                    | Vegetables leguminous plant root vegetables dishes and products |                                               |

**Supplementary File 1.** Foods classified as discretionary

| Food item                       | Classed as discretionary? | Decision was based on (with respect to the Australian definition)* | Original food group                                             | Food group as used in analysis (if different) |
|---------------------------------|---------------------------|--------------------------------------------------------------------|-----------------------------------------------------------------|-----------------------------------------------|
| Swedish brown beans roll        | No                        |                                                                    | Vegetables leguminous plant root vegetables dishes and products |                                               |
| Roasted onion                   | Yes                       | Vegetable that is deep-fried classed as discretionary              | Vegetables leguminous plant root vegetables dishes and products |                                               |
| Onion rings deep fried          | Yes                       | Vegetable that is deep-fried classed as discretionary              | Vegetables leguminous plant root vegetables dishes and products |                                               |
| Mineral water                   | No                        |                                                                    | Water, mineral water                                            |                                               |
| Tap water                       | No                        |                                                                    | Water, mineral water                                            |                                               |
| Spring water packed             | No                        |                                                                    | Water, mineral water                                            |                                               |
| Whey cheese fat 30% fortified   | No                        | Classed as cheese                                                  | Whey products                                                   |                                               |
| Whey spread fat 5% fortified    | No                        | Classed as cheese                                                  | Whey products                                                   |                                               |
| White wine vol. % 1             | Yes                       | All alcoholic drinks classed as discretionary                      | Wine                                                            |                                               |
| Red wine vol. % 14              | Yes                       | All alcoholic drinks classed as discretionary                      | Wine                                                            |                                               |
| White wine vol. % 12            | Yes                       | All alcoholic drinks classed as discretionary                      | Wine                                                            |                                               |
| Wine mulled vol. % 10           | Yes                       | All alcoholic drinks classed as discretionary                      | Wine                                                            |                                               |
| Sherry medium dry vol. % 17     | Yes                       | All alcoholic drinks classed as discretionary                      | Wine                                                            |                                               |
| Fortified wine mulled vol. % 16 | Yes                       | All alcoholic drinks classed as discretionary                      | Wine                                                            |                                               |
| Mulled wine (non-alcoholic)     | Yes                       | All alcoholic drinks classed as discretionary                      | Wine                                                            |                                               |
| Sparkling wine champagne        | Yes                       | All alcoholic drinks classed as discretionary                      | Wine                                                            |                                               |

\* Either the entire food group was considered a discretionary food group, the food met a specified criteria as described, or the food did not have an equivalent in the Australian system and our classification is provided.

\*\* Based on the composition of the foods in the Swedish database, we deviated from the Australian classification
